# Supplementary material for: Development and validation of a novel anoikis-related gene signature for predicting prognosis in ovarian cancer
Source: Aging (Albany NY). 2023 Apr 5;15(9):3410–26. doi: 10.18632/aging.204634 (PMC10449303; doi:10.18632/aging.204634)
Supplement: Supplementary Table 2 [file aging-15-204634-s002.xls]

## Sheet: Supplementary Table 2
Supplementary Table 2. ANRGs were collected from the GeneCard database.
Gene Symbol	Description	Category	Gifts	GC Id	Relevance score
NTRK2	Neurotrophic Receptor Tyrosine Kinase 2	Protein Coding	56	GC09P084668	7.26254
BCL2L11	BCL2 Like 11	Protein Coding	47	GC02P111119	6.6916
CEACAM6	CEA Cell Adhesion Molecule 6	Protein Coding	44	GC19P041750	6.10318
CAV1	Caveolin 1	Protein Coding	51	GC07P116524	5.4633
AKT1	AKT Serine/Threonine Kinase 1	Protein Coding	56	GC14M104769	5.40746
ITGB1	Integrin Subunit Beta 1	Protein Coding	53	GC10M033391	5.00296
CEACAM5	CEA Cell Adhesion Molecule 5	Protein Coding	45	GC19P069849	4.65579
EGFR	Epidermal Growth Factor Receptor	Protein Coding	58	GC07P055019	4.61561
CASP8	Caspase 8	Protein Coding	55	GC02P201233	4.48877
PTRH2	Peptidyl-TRNA Hydrolase 2	Protein Coding	45	GC17M059674	4.1929
DAPK2	Death Associated Protein Kinase 2	Protein Coding	43	GC15M063907	3.98848
ZNF304	Zinc Finger Protein 304	Protein Coding	32	GC19P057351	3.94012
MAPK1	Mitogen-Activated Protein Kinase 1	Protein Coding	54	GC22M021759	3.73449
TP53	Tumor Protein P53	Protein Coding	55	GC17M007661	3.63974
MCL1	MCL1 Apoptosis Regulator, BCL2 Family Member	Protein Coding	50	GC01M152371	3.57908
CDH1	Cadherin 1	Protein Coding	52	GC16P068737	3.05958
BAD	BCL2 Associated Agonist Of Cell Death	Protein Coding	47	GC11M096993	2.96305
PIK3CA	Phosphatidylinositol-4,5-Bisphosphate 3-Kinase Catalytic Subunit Alpha	Protein Coding	55	GC03P179148	2.94205
PAK1	P21 (RAC1) Activated Kinase 1	Protein Coding	52	GC11M097499	2.93086
ITGAV	Integrin Subunit Alpha V	Protein Coding	51	GC02P186589	2.87528
FN1	Fibronectin 1	Protein Coding	52	GC02M215360	2.82143
MAPK3	Mitogen-Activated Protein Kinase 3	Protein Coding	51	GC16M037779	2.72986
PTGS2	Prostaglandin-Endoperoxide Synthase 2	Protein Coding	51	GC01M186640	2.69213
BAX	BCL2 Associated X, Apoptosis Regulator	Protein Coding	52	GC19P048954	2.54813
ERBB2	Erb-B2 Receptor Tyrosine Kinase 2	Protein Coding	58	GC17P039687	2.43398
PDK4	Pyruvate Dehydrogenase Kinase 4	Protein Coding	46	GC07M095583	2.41536
YAP1	Yes1 Associated Transcriptional Regulator	Protein Coding	50	GC11P102110	2.33217
BIRC5	Baculoviral IAP Repeat Containing 5	Protein Coding	48	GC17P078214	2.25568
TIMP1	TIMP Metallopeptidase Inhibitor 1	Protein Coding	47	GC0XP047647	2.24534
AKT2	AKT Serine/Threonine Kinase 2	Protein Coding	56	GC19M040230	2.1826
STK11	Serine/Threonine Kinase 11	Protein Coding	53	GC19P001177	2.15035
IGF1	Insulin Like Growth Factor 1	Protein Coding	50	GC12M102395	2.14769
IGF1R	Insulin Like Growth Factor 1 Receptor	Protein Coding	57	GC15P098648	2.14696
ITGA6	Integrin Subunit Alpha 6	Protein Coding	52	GC02P172427	2.10977
CFLAR	CASP8 And FADD Like Apoptosis Regulator	Protein Coding	46	GC02P201117	2.08302
RHOA	Ras Homolog Family Member A	Protein Coding	52	GC03M049359	2.06858
HIF1A	Hypoxia Inducible Factor 1 Subunit Alpha	Protein Coding	51	GC14P061695	2.06497
DAP3	Death Associated Protein 3	Protein Coding	42	GC01P155810	2.0553
MYBBP1A	MYB Binding Protein 1a	Protein Coding	41	GC17M004538	2.02088
ITGA3	Integrin Subunit Alpha 3	Protein Coding	51	GC17P050055	1.99809
PTK2B	Protein Tyrosine Kinase 2 Beta	Protein Coding	51	GC08P027311	1.99505
CCND1	Cyclin D1	Protein Coding	55	GC11P069641	1.98137
CTTN	Cortactin	Protein Coding	45	GC11P070398	1.98137
ATF4	Activating Transcription Factor 4	Protein Coding	47	GC22P039519	1.94471
PLAUR	Plasminogen Activator, Urokinase Receptor	Protein Coding	47	GC19M043646	1.90784
SKP2	S-Phase Kinase Associated Protein 2	Protein Coding	46	GC05P036151	1.90784
HGF	Hepatocyte Growth Factor	Protein Coding	54	GC07M081699	1.88337
E2F1	E2F Transcription Factor 1	Protein Coding	45	GC20M033675	1.87998
EGF	Epidermal Growth Factor	Protein Coding	54	GC04P109912	1.87072
PIK3CG	Phosphatidylinositol-4,5-Bisphosphate 3-Kinase Catalytic Subunit Gamma	Protein Coding	50	GC07P106865	1.86744
ITGB4	Integrin Subunit Beta 4	Protein Coding	52	GC17P075721	1.85564
MAPK8	Mitogen-Activated Protein Kinase 8	Protein Coding	52	GC10P048306	1.83945
PIK3R1	Phosphoinositide-3-Kinase Regulatory Subunit 1	Protein Coding	53	GC05P068215	1.82063
PIK3R3	Phosphoinositide-3-Kinase Regulatory Subunit 3	Protein Coding	45	GC01M046041	1.81566
CXCL12	C-X-C Motif Chemokine Ligand 12	Protein Coding	46	GC10M044370	1.77687
LGALS3	Galectin 3	Protein Coding	48	GC14P055124	1.74145
BAK1	BCL2 Antagonist/Killer 1	Protein Coding	47	GC06M033572	1.7301
ABHD4	Abhydrolase Domain Containing 4, N-Acyl Phospholipase B	Protein Coding	41	GC14P033594	1.70641
CD44	CD44 Molecule (Indian Blood Group)	Protein Coding	50	GC11P035139	1.70294
ITGA4	Integrin Subunit Alpha 4	Protein Coding	50	GC02P181456	1.68965
TGFB1	Transforming Growth Factor Beta 1	Protein Coding	55	GC19M041301	1.6855
MMP2	Matrix Metallopeptidase 2	Protein Coding	55	GC16P055390	1.67228
CEMIP	Cell Migration Inducing Hyaluronidase 1	Protein Coding	39	GC15P080779	1.67228
CDKN3	Cyclin Dependent Kinase Inhibitor 3	Protein Coding	44	GC14P054398	1.66656
CBL	Cbl Proto-Oncogene	Protein Coding	54	GC11P119206	1.65423
CASP9	Caspase 9	Protein Coding	49	GC01M015491	1.65423
MTDH	Metadherin	Protein Coding	43	GC08P097644	1.65423
TNFRSF10B	TNF Receptor Superfamily Member 10b	Protein Coding	52	GC08M023020	1.63541
CDKN2A	Cyclin Dependent Kinase Inhibitor 2A	Protein Coding	52	GC09M021967	1.61572
CPT1A	Carnitine Palmitoyltransferase 1A	Protein Coding	51	GC11M068754	1.61572
PIK3CB	Phosphatidylinositol-4,5-Bisphosphate 3-Kinase Catalytic Subunit Beta	Protein Coding	50	GC03M138652	1.61572
CDKN1A	Cyclin Dependent Kinase Inhibitor 1A	Protein Coding	51	GC06P087904	1.59501
CDKN1B	Cyclin Dependent Kinase Inhibitor 1B	Protein Coding	50	GC12P022586	1.59501
KLF12	KLF Transcription Factor 12	Protein Coding	40	GC13M073686	1.59501
PLAU	Plasminogen Activator, Urokinase	Protein Coding	55	GC10P073909	1.57311
MYC	MYC Proto-Oncogene, BHLH Transcription Factor	Protein Coding	54	GC08P127735	1.57311
SMAD4	SMAD Family Member 4	Protein Coding	54	GC18P051028	1.57311
LGALS1	Galectin 1	Protein Coding	45	GC22P037675	1.57311
PYCARD	PYD And CARD Domain Containing	Protein Coding	44	GC16M031201	1.57311
KRAS	KRAS Proto-Oncogene, GTPase	Protein Coding	54	GC12M025204	1.56846
THBS1	Thrombospondin 1	Protein Coding	48	GC15P039581	1.5498
BID	BH3 Interacting Domain Death Agonist	Protein Coding	47	GC22M017734	1.5498
XIAP	X-Linked Inhibitor Of Apoptosis	Protein Coding	54	GC0XP123859	1.51813
PPARG	Peroxisome Proliferator Activated Receptor Gamma	Protein Coding	55	GC03P012287	1.49752
IL6	Interleukin 6	Protein Coding	53	GC07P022725	1.49752
CCR7	C-C Motif Chemokine Receptor 7	Protein Coding	47	GC17M049365	1.4674
MSLN	Mesothelin	Protein Coding	45	GC16P012620	1.4674
RAC1	Rac Family Small GTPase 1	Protein Coding	51	GC07P006377	1.46156
GRHL2	Grainyhead Like Transcription Factor 2	Protein Coding	43	GC08P101492	1.46156
BIRC3	Baculoviral IAP Repeat Containing 3	Protein Coding	48	GC11P102317	1.44828
NOTCH1	Notch Receptor 1	Protein Coding	55	GC09M137632	1.43815
MMP13	Matrix Metallopeptidase 13	Protein Coding	54	GC11M102942	1.39855
FAS	Fas Cell Surface Death Receptor	Protein Coding	53	GC10P093591	1.39565
EDA2R	Ectodysplasin A2 Receptor	Protein Coding	45	GC0XM066595	1.39265
MMP9	Matrix Metallopeptidase 9	Protein Coding	56	GC20P046008	1.37434
ABL1	ABL Proto-Oncogene 1, Non-Receptor Tyrosine Kinase	Protein Coding	55	GC09P130713	1.37434
PTHLH	Parathyroid Hormone Like Hormone	Protein Coding	48	GC12M027959	1.3706
PDGFB	Platelet Derived Growth Factor Subunit B	Protein Coding	53	GC22M060099	1.35364
GLI2	GLI Family Zinc Finger 2	Protein Coding	51	GC02P120735	1.35364
EZH2	Enhancer Of Zeste 2 Polycomb Repressive Complex 2 Subunit	Protein Coding	56	GC07M148807	1.35258
RIPK1	Receptor Interacting Serine/Threonine Kinase 1	Protein Coding	51	GC06P003313	1.35137
CXCR4	C-X-C Motif Chemokine Receptor 4	Protein Coding	55	GC02M136114	1.34337
HMGA1	High Mobility Group AT-Hook 1	Protein Coding	48	GC06P087865	1.33174
TNFSF10	TNF Superfamily Member 10	Protein Coding	47	GC03M172505	1.33174
ANGPTL2	Angiopoietin Like 2	Protein Coding	40	GC09M127087	1.31324
LATS1	Large Tumor Suppressor Kinase 1	Protein Coding	46	GC06M149658	1.28338
LAMC2	Laminin Subunit Gamma 2	Protein Coding	50	GC01P183186	1.28038
LAMA3	Laminin Subunit Alpha 3	Protein Coding	48	GC18P023689	1.28038
CSNK2A1	Casein Kinase 2 Alpha 1	Protein Coding	53	GC20M000472	1.26068
TLN1	Talin 1	Protein Coding	44	GC09M035696	1.25615
EPHA2	EPH Receptor A2	Protein Coding	56	GC01M016124	1.23997
SIRT3	Sirtuin 3	Protein Coding	50	GC11M000215	1.23997
CLU	Clusterin	Protein Coding	50	GC08M027596	1.22602
TSG101	Tumor Susceptibility 101	Protein Coding	45	GC11M018468	1.21808
AKT3	AKT Serine/Threonine Kinase 3	Protein Coding	57	GC01M243488	1.19476
TNFRSF1A	TNF Receptor Superfamily Member 1A	Protein Coding	52	GC12M006328	1.19476
FASLG	Fas Ligand	Protein Coding	50	GC01P172628	1.19476
AFP	Alpha Fetoprotein	Protein Coding	48	GC04P073431	1.19476
ITGA8	Integrin Subunit Alpha 8	Protein Coding	48	GC10M015513	1.19476
NOX4	NADPH Oxidase 4	Protein Coding	47	GC11M089324	1.19476
CD63	CD63 Molecule	Protein Coding	45	GC12M055725	1.19476
MAVS	Mitochondrial Antiviral Signaling Protein	Protein Coding	41	GC20P004406	1.19476
HRC	Histidine Rich Calcium Binding Protein	Protein Coding	39	GC19M049151	1.19476
RHOB	Ras Homolog Family Member B	Protein Coding	47	GC02P020447	1.19183
PPP1R13B	Protein Phosphatase 1 Regulatory Subunit 13B	Protein Coding	40	GC14M103733	1.19183
PLG	Plasminogen	Protein Coding	52	GC06P160702	1.18563
MET	MET Proto-Oncogene, Receptor Tyrosine Kinase	Protein Coding	56	GC07P116672	1.18429
RAF1	Raf-1 Proto-Oncogene, Serine/Threonine Kinase	Protein Coding	57	GC03M012583	1.16972
PARP1	Poly(ADP-Ribose) Polymerase 1	Protein Coding	53	GC01M226360	1.16972
PRKCQ	Protein Kinase C Theta	Protein Coding	51	GC10M006557	1.16972
BRCA2	BRCA2 DNA Repair Associated	Protein Coding	50	GC13P032315	1.16972
RB1	RB Transcriptional Corepressor 1	Protein Coding	50	GC13P048303	1.16972
DOCK1	Dedicator Of Cytokinesis 1	Protein Coding	47	GC10P126905	1.16972
PRPF4B	Pre-MRNA Processing Factor 4B	Protein Coding	44	GC06P004021	1.16972
RANBP9	RAN Binding Protein 9	Protein Coding	44	GC06M013621	1.16972
SESN1	Sestrin 1	Protein Coding	43	GC06M108986	1.16972
KDR	Kinase Insert Domain Receptor	Protein Coding	56	GC04M055078	1.14248
MDM2	MDM2 Proto-Oncogene	Protein Coding	55	GC12P068808	1.14248
NFE2L2	NFE2 Like BZIP Transcription Factor 2	Protein Coding	53	GC02M177227	1.14248
ZEB1	Zinc Finger E-Box Binding Homeobox 1	Protein Coding	51	GC10P031318	1.14248
KL	Klotho	Protein Coding	50	GC13P033016	1.14248
CRYAB	Crystallin Alpha B	Protein Coding	48	GC11M111908	1.14248
EPHB6	EPH Receptor B6	Protein Coding	48	GC07P148810	1.14248
FGF2	Fibroblast Growth Factor 2	Protein Coding	48	GC04P122826	1.14248
LTF	Lactotransferrin	Protein Coding	48	GC03M046435	1.14248
IQGAP1	IQ Motif Containing GTPase Activating Protein 1	Protein Coding	46	GC15P090388	1.14248
MGAT5	Alpha-1,6-Mannosylglycoprotein 6-Beta-N-Acetylglucosaminyltransferase	Protein Coding	44	GC02P134119	1.14248
SDCBP	Syndecan Binding Protein	Protein Coding	44	GC08P058539	1.14248
ABHD2	Abhydrolase Domain Containing 2, Acylglycerol Lipase	Protein Coding	42	GC15P089087	1.14248
PDGFRB	Platelet Derived Growth Factor Receptor Beta	Protein Coding	56	GC05M150113	1.11236
PLAT	Plasminogen Activator, Tissue Type	Protein Coding	54	GC08M042174	1.11236
ROCK1	Rho Associated Coiled-Coil Containing Protein Kinase 1	Protein Coding	52	GC18M020946	1.11236
PAK4	P21 (RAC1) Activated Kinase 4	Protein Coding	51	GC19P039125	1.11236
VEGFA	Vascular Endothelial Growth Factor A	Protein Coding	51	GC06P043770	1.11236
CASP10	Caspase 10	Protein Coding	50	GC02P201182	1.11236
PIN1	Peptidylprolyl Cis/Trans Isomerase, NIMA-Interacting 1	Protein Coding	50	GC19P009835	1.11236
TWIST1	Twist Family BHLH Transcription Factor 1	Protein Coding	47	GC07M019020	1.11236
BMP6	Bone Morphogenetic Protein 6	Protein Coding	46	GC06P007726	1.11236
BNIP3L	BCL2 Interacting Protein 3 Like	Protein Coding	45	GC08P026383	1.11236
ELK1	ETS Transcription Factor ELK1	Protein Coding	45	GC0XM047635	1.11236
KDM3A	Lysine Demethylase 3A	Protein Coding	44	GC02P086440	1.11236
PRDX4	Peroxiredoxin 4	Protein Coding	44	GC0XP023665	1.11236
LMO3	LIM Domain Only 3	Protein Coding	41	GC12M016548	1.11236
SLC2A1	Solute Carrier Family 2 Member 1	Protein Coding	56	GC01M042925	1.07817
HMOX1	Heme Oxygenase 1	Protein Coding	55	GC22P035380	1.07817
PRKACA	Protein Kinase CAMP-Activated Catalytic Subunit Alpha	Protein Coding	54	GC19M014559	1.07817
PAK3	P21 (RAC1) Activated Kinase 3	Protein Coding	53	GC0XP110944	1.07817
CD36	CD36 Molecule	Protein Coding	52	GC07P080369	1.07817
PIK3R2	Phosphoinositide-3-Kinase Regulatory Subunit 2	Protein Coding	52	GC19P018153	1.07817
PPP2CA	Protein Phosphatase 2 Catalytic Subunit Alpha	Protein Coding	52	GC05M134194	1.07817
CASP6	Caspase 6	Protein Coding	51	GC04M109688	1.07817
CDH3	Cadherin 3	Protein Coding	50	GC16P068637	1.07817
LRP1	LDL Receptor Related Protein 1	Protein Coding	50	GC12P057128	1.07817
PTK6	Protein Tyrosine Kinase 6	Protein Coding	50	GC20M063528	1.07817
TCF7L2	Transcription Factor 7 Like 2	Protein Coding	49	GC10P112950	1.07817
CEACAM1	CEA Cell Adhesion Molecule 1	Protein Coding	48	GC19M042507	1.07817
GLO1	Glyoxalase I	Protein Coding	47	GC06M069363	1.07817
IL17A	Interleukin 17A	Protein Coding	47	GC06P052186	1.07817
RBL2	RB Transcriptional Corepressor Like 2	Protein Coding	47	GC16P053433	1.07817
TRAF2	TNF Receptor Associated Factor 2	Protein Coding	47	GC09P136881	1.07817
ADCY10	Adenylate Cyclase 10	Protein Coding	46	GC01M167809	1.07817
TNFRSF12A	TNF Receptor Superfamily Member 12A	Protein Coding	44	GC16P003018	1.07817
BAG1	BAG Cochaperone 1	Protein Coding	43	GC09M033245	1.07817
MNX1	Motor Neuron And Pancreas Homeobox 1	Protein Coding	43	GC07M156994	1.07817
SNAI2	Snail Family Transcriptional Repressor 2	Protein Coding	48	GC08M048917	1.05007
NOTCH3	Notch Receptor 3	Protein Coding	53	GC19M015159	1.03761
GLUD1	Glutamate Dehydrogenase 1	Protein Coding	52	GC10M087050	1.03761
SIRT1	Sirtuin 1	Protein Coding	52	GC10P067884	1.03761
MYH9	Myosin Heavy Chain 9	Protein Coding	51	GC22M036281	1.03761
RPS6KB1	Ribosomal Protein S6 Kinase B1	Protein Coding	51	GC17P059893	1.03761
TPM1	Tropomyosin 1	Protein Coding	51	GC15P123360	1.03761
PPP2R1A	Protein Phosphatase 2 Scaffold Subunit Aalpha	Protein Coding	50	GC19P070335	1.03761
COL4A2	Collagen Type IV Alpha 2 Chain	Protein Coding	49	GC13P110305	1.03761
MMP11	Matrix Metallopeptidase 11	Protein Coding	47	GC22P023768	1.03761
ARHGEF7	Rho Guanine Nucleotide Exchange Factor 7	Protein Coding	45	GC13P111114	1.03761
SEMA7A	Semaphorin 7A (John Milton Hagen Blood Group)	Protein Coding	45	GC15M074409	1.03761
PPP2R5A	Protein Phosphatase 2 Regulatory Subunit B'Alpha	Protein Coding	43	GC01P212285	1.03761
BST2	Bone Marrow Stromal Cell Antigen 2	Protein Coding	42	GC19M017403	1.03761
ITGB5	Integrin Subunit Beta 5	Protein Coding	50	GC03M124761	0.984749
FER	FER Tyrosine Kinase	Protein Coding	48	GC05P108747	0.984749
TP73	Tumor Protein P73	Protein Coding	48	GC01P003652	0.984749
SLCO1B3	Solute Carrier Organic Anion Transporter Family Member 1B3	Protein Coding	47	GC12P020810	0.984749
DLG1	Discs Large MAGUK Scaffold Protein 1	Protein Coding	46	GC03M197042	0.984749
EDAR	Ectodysplasin A Receptor	Protein Coding	46	GC02M108894	0.984749
BCL2L2	BCL2 Like 2	Protein Coding	45	GC14P033738	0.984749
SH3GLB1	SH3 Domain Containing GRB2 Like, Endophilin B1	Protein Coding	44	GC01P086704	0.984749
TSC2	TSC Complex Subunit 2	Protein Coding	51	GC16P012688	0.958522
MAP3K7	Mitogen-Activated Protein Kinase Kinase Kinase 7	Protein Coding	53	GC06M090513	0.917962
F10	Coagulation Factor X	Protein Coding	53	GC13P113122	0.857139
F3	Coagulation Factor III, Tissue Factor	Protein Coding	48	GC01M094599	0.857139
SERPINB1	Serpin Family B Member 1	Protein Coding	43	GC06M002847	0.857139
MAP3K1	Mitogen-Activated Protein Kinase Kinase Kinase 1	Protein Coding	52	GC05P056815	0.83795
CEACAM4	CEA Cell Adhesion Molecule 4	Protein Coding	37	GC19M067892	0.803757
PXN	Paxillin	Protein Coding	47	GC12M120210	0.791615
GSTP1	Glutathione S-Transferase Pi 1	Protein Coding	53	GC11P067583	0.763197
PRDX1	Peroxiredoxin 1	Protein Coding	52	GC01M045511	0.763197
CRYBA1	Crystallin Beta A1	Protein Coding	41	GC17P029246	0.737493
SERPINE1	Serpin Family E Member 1	Protein Coding	52	GC07P101127	0.730513
FOXO3	Forkhead Box O3	Protein Coding	48	GC06P108559	0.729289
ARHGDIA	Rho GDP Dissociation Inhibitor Alpha	Protein Coding	49	GC17M081867	0.710339
EZR	Ezrin	Protein Coding	48	GC06M158765	0.710339
SLC39A6	Solute Carrier Family 39 Member 6	Protein Coding	42	GC18M036108	0.710339
BIN1	Bridging Integrator 1	Protein Coding	48	GC02M127048	0.700655
PDPK1	3-Phosphoinositide Dependent Protein Kinase 1	Protein Coding	51	GC16P002537	0.69632
SMAD7	SMAD Family Member 7	Protein Coding	48	GC18M048919	0.673421
NTRK3	Neurotrophic Receptor Tyrosine Kinase 3	Protein Coding	55	GC15M087859	0.643296
CASP2	Caspase 2	Protein Coding	50	GC07P148816	0.635348
TNC	Tenascin C	Protein Coding	52	GC09M115019	0.612036
IRF6	Interferon Regulatory Factor 6	Protein Coding	45	GC01M209785	0.612036
XAF1	XIAP Associated Factor 1	Protein Coding	41	GC17P006757	0.586991
SFRP1	Secreted Frizzled Related Protein 1	Protein Coding	47	GC08M041262	0.582729
MAP2K2	Mitogen-Activated Protein Kinase Kinase 2	Protein Coding	56	GC19M004090	0.568543
CSK	C-Terminal Src Kinase	Protein Coding	50	GC15P074782	0.568543
PIK3C2B	Phosphatidylinositol-4-Phosphate 3-Kinase Catalytic Subunit Type 2 Beta	Protein Coding	49	GC01M204422	0.568543
TAGLN	Transgelin	Protein Coding	46	GC11P117199	0.568543
ARHGDIB	Rho GDP Dissociation Inhibitor Beta	Protein Coding	44	GC12M014942	0.568543
LDHA	Lactate Dehydrogenase A	Protein Coding	54	GC11P018394	0.529631
SPP1	Secreted Phosphoprotein 1	Protein Coding	49	GC04P087975	0.529631
SMARCE1	SWI/SNF Related, Matrix Associated, Actin Dependent Regulator Of Chromatin, Subfamily E, Member 1	Protein Coding	47	GC17M040624	0.529631
QSOX1	Quiescin Sulfhydryl Oxidase 1	Protein Coding	41	GC01P180154	0.529631
RBFOX2	RNA Binding Fox-1 Homolog 2	Protein Coding	41	GC22M035738	0.529631
CDC42	Cell Division Cycle 42	Protein Coding	53	GC01P022052	0.495438
ATF2	Activating Transcription Factor 2	Protein Coding	50	GC02M175072	0.495438
NDRG1	N-Myc Downstream Regulated 1	Protein Coding	48	GC08M133237	0.495438
NKX2-1	NK2 Homeobox 1	Protein Coding	48	GC14M036516	0.495438
CRABP2	Cellular Retinoic Acid Binding Protein 2	Protein Coding	46	GC01M156701	0.495438
ID2	Inhibitor Of DNA Binding 2	Protein Coding	46	GC02P008678	0.495438
CEACAM8	CEA Cell Adhesion Molecule 8	Protein Coding	41	GC19M042580	0.495438
HSPB1	Heat Shock Protein Family B (Small) Member 1	Protein Coding	54	GC07P076302	0.454879
NGF	Nerve Growth Factor	Protein Coding	54	GC01M115285	0.454879
PCNA	Proliferating Cell Nuclear Antigen	Protein Coding	53	GC20M005114	0.454879
GSK3B	Glycogen Synthase Kinase 3 Beta	Protein Coding	52	GC03M119821	0.454879
TP63	Tumor Protein P63	Protein Coding	50	GC03P189598	0.454879
CTNNA1	Catenin Alpha 1	Protein Coding	48	GC05P138613	0.454879
OGT	O-Linked N-Acetylglucosamine (GlcNAc) Transferase	Protein Coding	47	GC0XP071534	0.454879
SIRT6	Sirtuin 6	Protein Coding	47	GC19M004174	0.454879
ACP1	Acid Phosphatase 1	Protein Coding	45	GC02P000364	0.454879
FOXA1	Forkhead Box A1	Protein Coding	45	GC14M037589	0.454879
STK38	Serine/Threonine Kinase 38	Protein Coding	45	GC06M036493	0.454879
RHOQ	Ras Homolog Family Member Q	Protein Coding	44	GC02P046543	0.454879
S100A7	S100 Calcium Binding Protein A7	Protein Coding	43	GC01M153457	0.454879
SRSF3	Serine And Arginine Rich Splicing Factor 3	Protein Coding	43	GC06P087901	0.454879
MUC4	Mucin 4, Cell Surface Associated	Protein Coding	42	GC03M195746	0.454879
DNMT1	DNA Methyltransferase 1	Protein Coding	55	GC19M010133	0.402021
CDK2	Cyclin Dependent Kinase 2	Protein Coding	54	GC12P055966	0.402021
MMP3	Matrix Metallopeptidase 3	Protein Coding	53	GC11M102835	0.402021
ACTB	Actin Beta	Protein Coding	52	GC07M005527	0.402021
BRCA1	BRCA1 DNA Repair Associated	Protein Coding	52	GC17M043044	0.402021
NOS2	Nitric Oxide Synthase 2	Protein Coding	51	GC17M027756	0.402021
USP9X	Ubiquitin Specific Peptidase 9 X-Linked	Protein Coding	51	GC0XP041085	0.402021
FYN	FYN Proto-Oncogene, Src Family Tyrosine Kinase	Protein Coding	49	GC06M111660	0.402021
HTRA2	HtrA Serine Peptidase 2	Protein Coding	48	GC02P074529	0.402021
SNAI1	Snail Family Transcriptional Repressor 1	Protein Coding	48	GC20P049982	0.402021
PRDM1	PR/SET Domain 1	Protein Coding	47	GC06P105993	0.402021
TPP2	Tripeptidyl Peptidase 2	Protein Coding	47	GC13P102596	0.402021
XRCC5	X-Ray Repair Cross Complementing 5	Protein Coding	47	GC02P216107	0.402021
CLDN18	Claudin 18	Protein Coding	46	GC03P137998	0.402021
TJP1	Tight Junction Protein 1	Protein Coding	46	GC15M029699	0.402021
CENPF	Centromere Protein F	Protein Coding	45	GC01P214603	0.402021
DOK2	Docking Protein 2	Protein Coding	45	GC08M021908	0.402021
USP11	Ubiquitin Specific Peptidase 11	Protein Coding	44	GC0XP047232	0.402021
ELAVL1	ELAV Like RNA Binding Protein 1	Protein Coding	43	GC19M007958	0.402021
LGALS8	Galectin 8	Protein Coding	43	GC01P236518	0.402021
SRPX2	Sushi Repeat Containing Protein X-Linked 2	Protein Coding	43	GC0XP100648	0.402021
SLPI	Secretory Leukocyte Peptidase Inhibitor	Protein Coding	42	GC20M045252	0.402021
EFHD2	EF-Hand Domain Family Member D2	Protein Coding	40	GC01P015409	0.402021
CXCL14	C-X-C Motif Chemokine Ligand 14	Protein Coding	39	GC05M135617	0.402021
KIF18A	Kinesin Family Member 18A	Protein Coding	38	GC11M028020	0.402021
KIF14	Kinesin Family Member 14	Protein Coding	44	GC01M200551	0.388074
GZMB	Granzyme B	Protein Coding	50	GC14M024630	0.360938
NRP1	Neuropilin 1	Protein Coding	50	GC10M033177	0.337626
KLF5	KLF Transcription Factor 5	Protein Coding	47	GC13P073054	0.312581
MAP2K4	Mitogen-Activated Protein Kinase Kinase 4	Protein Coding	48	GC17P012020	0.285346
SCD	Stearoyl-CoA Desaturase	Protein Coding	52	GC10P100347	0.27441
BMP2	Bone Morphogenetic Protein 2	Protein Coding	51	GC20P006767	0.27441
GRN	Granulin Precursor	Protein Coding	51	GC17P044345	0.27441
KRT18	Keratin 18	Protein Coding	51	GC12P052948	0.27441
ETS1	ETS Proto-Oncogene 1, Transcription Factor	Protein Coding	50	GC11M128458	0.27441
F9	Coagulation Factor IX	Protein Coding	50	GC0XP139530	0.27441
GLI1	GLI Family Zinc Finger 1	Protein Coding	50	GC12P057462	0.27441
SH2B3	SH2B Adaptor Protein 3	Protein Coding	50	GC12P111405	0.27441
SOX9	SRY-Box Transcription Factor 9	Protein Coding	48	GC17P072121	0.27441
SKP1	S-Phase Kinase Associated Protein 1	Protein Coding	47	GC05M134148	0.27441
S100A8	S100 Calcium Binding Protein A8	Protein Coding	45	GC01M153391	0.27441
SPOP	Speckle Type BTB/POZ Protein	Protein Coding	45	GC17M049598	0.27441
UBE2S	Ubiquitin Conjugating Enzyme E2 S	Protein Coding	44	GC19M055399	0.27441
STRN4	Striatin 4	Protein Coding	41	GC19M046719	0.27441
ITGB1BP1	Integrin Subunit Beta 1 Binding Protein 1	Protein Coding	40	GC02M009391	0.27441
ETV7	ETS Variant Transcription Factor 7	Protein Coding	38	GC06M069353	0.27441
PHLDA1	Pleckstrin Homology Like Domain Family A Member 1	Protein Coding	37	GC12M076025	0.27441
JAG1	Jagged Canonical Notch Ligand 1	Protein Coding	54	GC20M010637	0.255222
SDC4	Syndecan 4	Protein Coding	47	GC20M045325	0.255222
IGFBP5	Insulin Like Growth Factor Binding Protein 5	Protein Coding	45	GC02M216672	0.255222
PCMT1	Protein-L-Isoaspartate (D-Aspartate) O-Methyltransferase	Protein Coding	42	GC06P149749	0.255222
CAT	Catalase	Protein Coding	54	GC11P034460	0.221028
EP300	E1A Binding Protein P300	Protein Coding	54	GC22P041114	0.221028
MAPK14	Mitogen-Activated Protein Kinase 14	Protein Coding	54	GC06P087896	0.221028
KEAP1	Kelch Like ECH Associated Protein 1	Protein Coding	51	GC19M010486	0.221028
SGK1	Serum/Glucocorticoid Regulated Kinase 1	Protein Coding	51	GC06M134169	0.221028
PRKAA1	Protein Kinase AMP-Activated Catalytic Subunit Alpha 1	Protein Coding	50	GC05M040759	0.221028
KLF4	KLF Transcription Factor 4	Protein Coding	48	GC09M107484	0.221028
MAP3K14	Mitogen-Activated Protein Kinase Kinase Kinase 14	Protein Coding	47	GC17M045263	0.221028
VTCN1	V-Set Domain Containing T Cell Activation Inhibitor 1	Protein Coding	43	GC01M117143	0.221028
MPO	Myeloperoxidase	Protein Coding	55	GC17M058269	0.180469
NFKB1	Nuclear Factor Kappa B Subunit 1	Protein Coding	55	GC04P102501	0.180469
EDNRB	Endothelin Receptor Type B	Protein Coding	52	GC13M077895	0.180469
MAPK10	Mitogen-Activated Protein Kinase 10	Protein Coding	51	GC04M085990	0.180469
MMP8	Matrix Metallopeptidase 8	Protein Coding	51	GC11M102617	0.180469
MMP7	Matrix Metallopeptidase 7	Protein Coding	50	GC11M102425	0.180469
MAP3K8	Mitogen-Activated Protein Kinase Kinase Kinase 8	Protein Coding	49	GC10P030520	0.180469
ADAM12	ADAM Metallopeptidase Domain 12	Protein Coding	48	GC10M126012	0.180469
BIRC2	Baculoviral IAP Repeat Containing 2	Protein Coding	48	GC11P102347	0.180469
PML	PML Nuclear Body Scaffold	Protein Coding	48	GC15P073994	0.180469
TGM1	Transglutaminase 1	Protein Coding	48	GC14M024249	0.180469
CMA1	Chymase 1	Protein Coding	47	GC14M024506	0.180469
TRIM28	Tripartite Motif Containing 28	Protein Coding	46	GC19P058544	0.180469
RBP1	Retinol Binding Protein 1	Protein Coding	43	GC03M139517	0.180469
SNX1	Sorting Nexin 1	Protein Coding	43	GC15P064094	0.180469
CARD10	Caspase Recruitment Domain Family Member 10	Protein Coding	41	GC22M059425	0.180469
CD99	CD99 Molecule (Xg Blood Group)	Protein Coding	41	GC0XP002691	0.180469
LYPD1	LY6/PLAUR Domain Containing 1	Protein Coding	41	GC02M134396	0.180469
RAB25	RAB25, Member RAS Oncogene Family	Protein Coding	41	GC01P156061	0.180469
CLPTM1	CLPTM1 Regulator Of GABA Type A Receptor Forward Trafficking	Protein Coding	40	GC19P044954	0.180469
IFI6	Interferon Alpha Inducible Protein 6	Protein Coding	40	GC01M027666	0.180469
STX2	Syntaxin 2	Protein Coding	40	GC12M130789	0.180469
FGFR1	Fibroblast Growth Factor Receptor 1	Protein Coding	59	GC08M038400	0.127611
HDAC6	Histone Deacetylase 6	Protein Coding	56	GC0XP048801	0.127611
TGFBR1	Transforming Growth Factor Beta Receptor 1	Protein Coding	56	GC09P099104	0.127611
STAT1	Signal Transducer And Activator Of Transcription 1	Protein Coding	55	GC02M190908	0.127611
NFKB2	Nuclear Factor Kappa B Subunit 2	Protein Coding	54	GC10P102394	0.127611
TGFB2	Transforming Growth Factor Beta 2	Protein Coding	54	GC01P218345	0.127611
ICAM1	Intercellular Adhesion Molecule 1	Protein Coding	53	GC19P010638	0.127611
TF	Transferrin	Protein Coding	53	GC03P134678	0.127611
VIM	Vimentin	Protein Coding	53	GC10P017227	0.127611
EDNRA	Endothelin Receptor Type A	Protein Coding	52	GC04P147480	0.127611
IFNG	Interferon Gamma	Protein Coding	52	GC12M068154	0.127611
LAMB1	Laminin Subunit Beta 1	Protein Coding	52	GC07M107923	0.127611
RARA	Retinoic Acid Receptor Alpha	Protein Coding	52	GC17P040309	0.127611
WNT5A	Wnt Family Member 5A	Protein Coding	52	GC03M055465	0.127611
YWHAE	Tyrosine 3-Monooxygenase/Tryptophan 5-Monooxygenase Activation Protein Epsilon	Protein Coding	52	GC17M004893	0.127611
BMP4	Bone Morphogenetic Protein 4	Protein Coding	51	GC14M053949	0.127611
BRD4	Bromodomain Containing 4	Protein Coding	51	GC19M015236	0.127611
ESR2	Estrogen Receptor 2	Protein Coding	51	GC14M064084	0.127611
GSN	Gelsolin	Protein Coding	51	GC09P121201	0.127611
IL2	Interleukin 2	Protein Coding	51	GC04M122451	0.127611
LEF1	Lymphoid Enhancer Binding Factor 1	Protein Coding	51	GC04M108047	0.127611
PTPN12	Protein Tyrosine Phosphatase Non-Receptor Type 12	Protein Coding	51	GC07P077537	0.127611
RAB27A	RAB27A, Member RAS Oncogene Family	Protein Coding	51	GC15M055202	0.127611
FGF1	Fibroblast Growth Factor 1	Protein Coding	50	GC05M142555	0.127611
GATA6	GATA Binding Protein 6	Protein Coding	50	GC18P022169	0.127611
IGFBP3	Insulin Like Growth Factor Binding Protein 3	Protein Coding	50	GC07M045912	0.127611
IL10	Interleukin 10	Protein Coding	50	GC01M206767	0.127611
IL1B	Interleukin 1 Beta	Protein Coding	50	GC02M112829	0.127611
NCOA3	Nuclear Receptor Coactivator 3	Protein Coding	50	GC20P047501	0.127611
NGFR	Nerve Growth Factor Receptor	Protein Coding	50	GC17P049495	0.127611
NR4A1	Nuclear Receptor Subfamily 4 Group A Member 1	Protein Coding	50	GC12P052022	0.127611
VCL	Vinculin	Protein Coding	50	GC10P073995	0.127611
ACTN4	Actinin Alpha 4	Protein Coding	49	GC19P038647	0.127611
IL4	Interleukin 4	Protein Coding	49	GC05P132673	0.127611
LAMA1	Laminin Subunit Alpha 1	Protein Coding	49	GC18M006941	0.127611
PDK1	Pyruvate Dehydrogenase Kinase 1	Protein Coding	49	GC02P172555	0.127611
ROCK2	Rho Associated Coiled-Coil Containing Protein Kinase 2	Protein Coding	49	GC02M011320	0.127611
ATP2A3	ATPase Sarcoplasmic/Endoplasmic Reticulum Ca2+ Transporting 3	Protein Coding	48	GC17M003923	0.127611
BMP7	Bone Morphogenetic Protein 7	Protein Coding	48	GC20M057168	0.127611
EEF1A2	Eukaryotic Translation Elongation Factor 1 Alpha 2	Protein Coding	48	GC20M063488	0.127611
KITLG	KIT Ligand	Protein Coding	48	GC12M088492	0.127611
SMARCB1	SWI/SNF Related, Matrix Associated, Actin Dependent Regulator Of Chromatin, Subfamily B, Member 1	Protein Coding	48	GC22P023786	0.127611
CAST	Calpastatin	Protein Coding	47	GC05P096525	0.127611
CCT5	Chaperonin Containing TCP1 Subunit 5	Protein Coding	47	GC05P010236	0.127611
CHI3L1	Chitinase 3 Like 1	Protein Coding	47	GC01M203148	0.127611
COL17A1	Collagen Type XVII Alpha 1 Chain	Protein Coding	47	GC10M104031	0.127611
EPO	Erythropoietin	Protein Coding	47	GC07P100720	0.127611
IL1A	Interleukin 1 Alpha	Protein Coding	47	GC02M112773	0.127611
MDK	Midkine	Protein Coding	47	GC11P046380	0.127611
PAK6	P21 (RAC1) Activated Kinase 6	Protein Coding	47	GC15P040217	0.127611
RAB5A	RAB5A, Member RAS Oncogene Family	Protein Coding	47	GC03P019948	0.127611
RAP1A	RAP1A, Member Of RAS Oncogene Family	Protein Coding	47	GC01P111542	0.127611
SORT1	Sortilin 1	Protein Coding	47	GC01M109310	0.127611
BCL10	BCL10 Immune Signaling Adaptor	Protein Coding	46	GC01M085265	0.127611
LAMA5	Laminin Subunit Alpha 5	Protein Coding	46	GC20M062307	0.127611
LAMC1	Laminin Subunit Gamma 1	Protein Coding	46	GC01P182992	0.127611
NNT	Nicotinamide Nucleotide Transhydrogenase	Protein Coding	46	GC05P043602	0.127611
PON2	Paraoxonase 2	Protein Coding	46	GC07M095404	0.127611
PTPN3	Protein Tyrosine Phosphatase Non-Receptor Type 3	Protein Coding	46	GC09M109375	0.127611
WIPF1	WAS/WASL Interacting Protein Family Member 1	Protein Coding	46	GC02M174559	0.127611
BST1	Bone Marrow Stromal Cell Antigen 1	Protein Coding	45	GC04P018710	0.127611
CSF3	Colony Stimulating Factor 3	Protein Coding	45	GC17P040015	0.127611
IGBP1	Immunoglobulin Binding Protein 1	Protein Coding	45	GC0XP070133	0.127611
LIF	LIF Interleukin 6 Family Cytokine	Protein Coding	45	GC22M030240	0.127611
MCAM	Melanoma Cell Adhesion Molecule	Protein Coding	45	GC11M119308	0.127611
NR4A3	Nuclear Receptor Subfamily 4 Group A Member 3	Protein Coding	45	GC09P099821	0.127611
SIX1	SIX Homeobox 1	Protein Coding	45	GC14M060643	0.127611
TBX3	T-Box Transcription Factor 3	Protein Coding	45	GC12M114670	0.127611
WNT2	Wnt Family Member 2	Protein Coding	45	GC07M117309	0.127611
ATP6V1F	ATPase H+ Transporting V1 Subunit F	Protein Coding	44	GC07P128862	0.127611
ATP6V1H	ATPase H+ Transporting V1 Subunit H	Protein Coding	44	GC08M053715	0.127611
COPS5	COP9 Signalosome Subunit 5	Protein Coding	44	GC08M067043	0.127611
DUSP4	Dual Specificity Phosphatase 4	Protein Coding	44	GC08M029334	0.127611
HIP1R	Huntingtin Interacting Protein 1 Related	Protein Coding	44	GC12P122834	0.127611
ME1	Malic Enzyme 1	Protein Coding	44	GC06M083210	0.127611
MID1	Midline 1	Protein Coding	44	GC0XM010445	0.127611
NUDT1	Nudix Hydrolase 1	Protein Coding	44	GC07P002242	0.127611
PPM1F	Protein Phosphatase, Mg2+/Mn2+ Dependent 1F	Protein Coding	44	GC22M021919	0.127611
TFAP2C	Transcription Factor AP-2 Gamma	Protein Coding	44	GC20P056629	0.127611
AGK	Acylglycerol Kinase	Protein Coding	43	GC07P141551	0.127611
IGF2BP3	Insulin Like Growth Factor 2 MRNA Binding Protein 3	Protein Coding	43	GC07M023320	0.127611
IL11	Interleukin 11	Protein Coding	43	GC19M055364	0.127611
MCF2	MCF.2 Cell Line Derived Transforming Sequence	Protein Coding	43	GC0XM139581	0.127611
SRGN	Serglycin	Protein Coding	43	GC10P069088	0.127611
WWP1	WW Domain Containing E3 Ubiquitin Protein Ligase 1	Protein Coding	43	GC08P086342	0.127611
WWTR1	WW Domain Containing Transcription Regulator 1	Protein Coding	43	GC03M149517	0.127611
CAPNS1	Calpain Small Subunit 1	Protein Coding	42	GC19P069651	0.127611
GRSF1	G-Rich RNA Sequence Binding Factor 1	Protein Coding	42	GC04M070815	0.127611
OAS2	2'-5'-Oligoadenylate Synthetase 2	Protein Coding	42	GC12P112978	0.127611
ARVCF	ARVCF Delta Catenin Family Member	Protein Coding	41	GC22M019966	0.127611
KHDRBS3	KH RNA Binding Domain Containing, Signal Transduction Associated 3	Protein Coding	41	GC08P135457	0.127611
NMU	Neuromedin U	Protein Coding	41	GC04M055595	0.127611
RAB27B	RAB27B, Member RAS Oncogene Family	Protein Coding	41	GC18P054717	0.127611
SS18	SS18 Subunit Of BAF Chromatin Remodeling Complex	Protein Coding	41	GC18M026016	0.127611
UBR4	Ubiquitin Protein Ligase E3 Component N-Recognin 4	Protein Coding	41	GC01M019074	0.127611
TRIM62	Tripartite Motif Containing 62	Protein Coding	40	GC01M033205	0.127611
VASH1	Vasohibin 1	Protein Coding	40	GC14P076761	0.127611
EI24	EI24 Autophagy Associated Transmembrane Protein	Protein Coding	38	GC11P125570	0.127611
SSX1	SSX Family Member 1	Protein Coding	37	GC0XP050891	0.127611
SYDE1	Synapse Defective Rho GTPase Homolog 1	Protein Coding	36	GC19P015107	0.127611
UBAP2	Ubiquitin Associated Protein 2	Protein Coding	36	GC09M033921	0.127611
