# Supplementary material for: Development and validation of a novel anoikis-related gene signature for predicting prognosis in ovarian cancer
Source: Aging (Albany NY). 2023 Apr 5;15(9):3410–26. doi: 10.18632/aging.204634 (PMC10449303; doi:10.18632/aging.204634)
Supplement: Supplementary Table 4 [file aging-15-204634-s004.xls]

## Sheet: Supplementary Table 4
Supplementary Table 4. KM analysis of 2^10 ‒1 = 1,023 combinations.
num.gene	km.pvalue	core.gene
1 gene	0.139406	STRN4
1 gene	0.439768	HGF
1 gene	0.000258118	WWP1
1 gene	0.0545794	CASP2
1 gene	0.00946073	STAT1
1 gene	0.0800256	SNAI1
1 gene	0.0157213	SFRP1
1 gene	0.154783	RB1
1 gene	0.0282712	PIN1
1 gene	0.134965	AKT2
2 genes	0.0805295	STRN4 | HGF
2 genes	0.0113155	STRN4 | WWP1
2 genes	0.0132347	STRN4 | CASP2
2 genes	0.000937797	STRN4 | STAT1
2 genes	0.0607822	STRN4 | SNAI1
2 genes	0.323353	STRN4 | SFRP1
2 genes	0.0251049	STRN4 | RB1
2 genes	0.0261989	STRN4 | PIN1
2 genes	0.126772	STRN4 | AKT2
2 genes	0.0355278	HGF | WWP1
2 genes	0.00280505	HGF | CASP2
2 genes	0.00198743	HGF | STAT1
2 genes	0.155963	HGF | SNAI1
2 genes	0.179109	HGF | SFRP1
2 genes	0.11086	HGF | RB1
2 genes	0.0405714	HGF | PIN1
2 genes	0.118655	HGF | AKT2
2 genes	0.000696146	WWP1 | CASP2
2 genes	0.000535434	WWP1 | STAT1
2 genes	0.00517902	WWP1 | SNAI1
2 genes	0.0059187	WWP1 | SFRP1
2 genes	0.00823401	WWP1 | RB1
2 genes	0.00428423	WWP1 | PIN1
2 genes	0.0464069	WWP1 | AKT2
2 genes	0.00390649	CASP2 | STAT1
2 genes	0.0244705	CASP2 | SNAI1
2 genes	0.121545	CASP2 | SFRP1
2 genes	0.000439794	CASP2 | RB1
2 genes	0.018437	CASP2 | PIN1
2 genes	0.060787	CASP2 | AKT2
2 genes	0.00500301	STAT1 | SNAI1
2 genes	0.033431	STAT1 | SFRP1
2 genes	3.78639e-06	STAT1 | RB1
2 genes	6.57385e-06	STAT1 | PIN1
2 genes	0.00114362	STAT1 | AKT2
2 genes	0.0835025	SNAI1 | SFRP1
2 genes	0.000163743	SNAI1 | RB1
2 genes	0.0258293	SNAI1 | PIN1
2 genes	0.00272214	SNAI1 | AKT2
2 genes	0.000467389	SFRP1 | RB1
2 genes	0.0324008	SFRP1 | PIN1
2 genes	0.0734846	SFRP1 | AKT2
2 genes	0.0298158	RB1 | PIN1
2 genes	0.00148684	RB1 | AKT2
2 genes	0.555988	PIN1 | AKT2
3 genes	0.0736661	STRN4 | HGF | WWP1
3 genes	0.000538051	STRN4 | HGF | CASP2
3 genes	0.00191114	STRN4 | HGF | STAT1
3 genes	0.026504	STRN4 | HGF | SNAI1
3 genes	0.137723	STRN4 | HGF | SFRP1
3 genes	0.00214893	STRN4 | HGF | RB1
3 genes	0.024699	STRN4 | HGF | PIN1
3 genes	0.126592	STRN4 | HGF | AKT2
3 genes	8.52035e-06	STRN4 | WWP1 | CASP2
3 genes	0.000214631	STRN4 | WWP1 | STAT1
3 genes	0.00167342	STRN4 | WWP1 | SNAI1
3 genes	0.0231915	STRN4 | WWP1 | SFRP1
3 genes	0.00471801	STRN4 | WWP1 | RB1
3 genes	0.0102728	STRN4 | WWP1 | PIN1
3 genes	0.0165223	STRN4 | WWP1 | AKT2
3 genes	0.000312107	STRN4 | CASP2 | STAT1
3 genes	0.0068737	STRN4 | CASP2 | SNAI1
3 genes	0.00526507	STRN4 | CASP2 | SFRP1
3 genes	9.36031e-05	STRN4 | CASP2 | RB1
3 genes	7.71871e-05	STRN4 | CASP2 | PIN1
3 genes	0.000511999	STRN4 | CASP2 | AKT2
3 genes	0.00195862	STRN4 | STAT1 | SNAI1
3 genes	0.00611112	STRN4 | STAT1 | SFRP1
3 genes	0.000110198	STRN4 | STAT1 | RB1
3 genes	3.61827e-05	STRN4 | STAT1 | PIN1
3 genes	0.000439064	STRN4 | STAT1 | AKT2
3 genes	0.0198139	STRN4 | SNAI1 | SFRP1
3 genes	0.000355125	STRN4 | SNAI1 | RB1
3 genes	0.0230468	STRN4 | SNAI1 | PIN1
3 genes	0.0060151	STRN4 | SNAI1 | AKT2
3 genes	0.0286198	STRN4 | SFRP1 | RB1
3 genes	0.0141396	STRN4 | SFRP1 | PIN1
3 genes	0.0939707	STRN4 | SFRP1 | AKT2
3 genes	0.0116276	STRN4 | RB1 | PIN1
3 genes	0.00715758	STRN4 | RB1 | AKT2
3 genes	0.112703	STRN4 | PIN1 | AKT2
3 genes	0.000661633	HGF | WWP1 | CASP2
3 genes	4.05027e-05	HGF | WWP1 | STAT1
3 genes	0.016091	HGF | WWP1 | SNAI1
3 genes	0.00573642	HGF | WWP1 | SFRP1
3 genes	0.0131224	HGF | WWP1 | RB1
3 genes	0.00122547	HGF | WWP1 | PIN1
3 genes	0.235851	HGF | WWP1 | AKT2
3 genes	0.0111716	HGF | CASP2 | STAT1
3 genes	0.00494395	HGF | CASP2 | SNAI1
3 genes	0.0038989	HGF | CASP2 | SFRP1
3 genes	0.00214074	HGF | CASP2 | RB1
3 genes	0.000603549	HGF | CASP2 | PIN1
3 genes	0.00456237	HGF | CASP2 | AKT2
3 genes	0.00692542	HGF | STAT1 | SNAI1
3 genes	0.0075857	HGF | STAT1 | SFRP1
3 genes	0.00010076	HGF | STAT1 | RB1
3 genes	0.00531197	HGF | STAT1 | PIN1
3 genes	0.00492584	HGF | STAT1 | AKT2
3 genes	0.0664766	HGF | SNAI1 | SFRP1
3 genes	0.0410317	HGF | SNAI1 | RB1
3 genes	0.0143517	HGF | SNAI1 | PIN1
3 genes	0.0420363	HGF | SNAI1 | AKT2
3 genes	0.00405573	HGF | SFRP1 | RB1
3 genes	0.0339503	HGF | SFRP1 | PIN1
3 genes	0.0601887	HGF | SFRP1 | AKT2
3 genes	0.0100841	HGF | RB1 | PIN1
3 genes	0.00263364	HGF | RB1 | AKT2
3 genes	0.0370438	HGF | PIN1 | AKT2
3 genes	0.00160039	WWP1 | CASP2 | STAT1
3 genes	0.00194912	WWP1 | CASP2 | SNAI1
3 genes	2.67357e-05	WWP1 | CASP2 | SFRP1
3 genes	4.15221e-05	WWP1 | CASP2 | RB1
3 genes	0.00454136	WWP1 | CASP2 | PIN1
3 genes	0.00200966	WWP1 | CASP2 | AKT2
3 genes	0.000214319	WWP1 | STAT1 | SNAI1
3 genes	0.000104772	WWP1 | STAT1 | SFRP1
3 genes	1.57443e-07	WWP1 | STAT1 | RB1
3 genes	0.000323475	WWP1 | STAT1 | PIN1
3 genes	5.3978e-06	WWP1 | STAT1 | AKT2
3 genes	0.00351052	WWP1 | SNAI1 | SFRP1
3 genes	0.00278176	WWP1 | SNAI1 | RB1
3 genes	0.00238248	WWP1 | SNAI1 | PIN1
3 genes	0.00460322	WWP1 | SNAI1 | AKT2
3 genes	0.0261937	WWP1 | SFRP1 | RB1
3 genes	0.01821	WWP1 | SFRP1 | PIN1
3 genes	0.150993	WWP1 | SFRP1 | AKT2
3 genes	0.0200057	WWP1 | RB1 | PIN1
3 genes	0.000961135	WWP1 | RB1 | AKT2
3 genes	0.00423743	WWP1 | PIN1 | AKT2
3 genes	0.0405094	CASP2 | STAT1 | SNAI1
3 genes	0.0102764	CASP2 | STAT1 | SFRP1
3 genes	1.44821e-05	CASP2 | STAT1 | RB1
3 genes	1.03414e-05	CASP2 | STAT1 | PIN1
3 genes	2.17724e-05	CASP2 | STAT1 | AKT2
3 genes	0.0586344	CASP2 | SNAI1 | SFRP1
3 genes	0.000145763	CASP2 | SNAI1 | RB1
3 genes	0.0216075	CASP2 | SNAI1 | PIN1
3 genes	0.019851	CASP2 | SNAI1 | AKT2
3 genes	0.00301875	CASP2 | SFRP1 | RB1
3 genes	0.0111518	CASP2 | SFRP1 | PIN1
3 genes	0.0209855	CASP2 | SFRP1 | AKT2
3 genes	0.00414026	CASP2 | RB1 | PIN1
3 genes	0.00444092	CASP2 | RB1 | AKT2
3 genes	0.123889	CASP2 | PIN1 | AKT2
3 genes	0.00378137	STAT1 | SNAI1 | SFRP1
3 genes	1.64451e-05	STAT1 | SNAI1 | RB1
3 genes	5.18803e-05	STAT1 | SNAI1 | PIN1
3 genes	0.000242873	STAT1 | SNAI1 | AKT2
3 genes	4.36625e-05	STAT1 | SFRP1 | RB1
3 genes	0.00161879	STAT1 | SFRP1 | PIN1
3 genes	0.0020304	STAT1 | SFRP1 | AKT2
3 genes	0.000100325	STAT1 | RB1 | PIN1
3 genes	1.1017e-05	STAT1 | RB1 | AKT2
3 genes	0.000355183	STAT1 | PIN1 | AKT2
3 genes	0.00195197	SNAI1 | SFRP1 | RB1
3 genes	0.277522	SNAI1 | SFRP1 | PIN1
3 genes	0.0351843	SNAI1 | SFRP1 | AKT2
3 genes	5.10351e-05	SNAI1 | RB1 | PIN1
3 genes	0.000316419	SNAI1 | RB1 | AKT2
3 genes	0.0326299	SNAI1 | PIN1 | AKT2
3 genes	0.0257026	SFRP1 | RB1 | PIN1
3 genes	0.00300351	SFRP1 | RB1 | AKT2
3 genes	0.266115	SFRP1 | PIN1 | AKT2
3 genes	0.0106292	RB1 | PIN1 | AKT2
4 genes	2.9277e-07	STRN4 | HGF | WWP1 | CASP2
4 genes	7.95691e-06	STRN4 | HGF | WWP1 | STAT1
4 genes	0.0710123	STRN4 | HGF | WWP1 | SNAI1
4 genes	0.0442391	STRN4 | HGF | WWP1 | SFRP1
4 genes	0.00690387	STRN4 | HGF | WWP1 | RB1
4 genes	0.0120231	STRN4 | HGF | WWP1 | PIN1
4 genes	0.0617891	STRN4 | HGF | WWP1 | AKT2
4 genes	0.000707161	STRN4 | HGF | CASP2 | STAT1
4 genes	0.00676737	STRN4 | HGF | CASP2 | SNAI1
4 genes	0.00774686	STRN4 | HGF | CASP2 | SFRP1
4 genes	0.000277958	STRN4 | HGF | CASP2 | RB1
4 genes	8.37433e-05	STRN4 | HGF | CASP2 | PIN1
4 genes	0.0046694	STRN4 | HGF | CASP2 | AKT2
4 genes	0.00105726	STRN4 | HGF | STAT1 | SNAI1
4 genes	0.0006328	STRN4 | HGF | STAT1 | SFRP1
4 genes	5.5309e-05	STRN4 | HGF | STAT1 | RB1
4 genes	4.67946e-05	STRN4 | HGF | STAT1 | PIN1
4 genes	0.00157673	STRN4 | HGF | STAT1 | AKT2
4 genes	0.0439649	STRN4 | HGF | SNAI1 | SFRP1
4 genes	0.000378713	STRN4 | HGF | SNAI1 | RB1
4 genes	0.0176394	STRN4 | HGF | SNAI1 | PIN1
4 genes	0.0212696	STRN4 | HGF | SNAI1 | AKT2
4 genes	0.0228775	STRN4 | HGF | SFRP1 | RB1
4 genes	0.00382904	STRN4 | HGF | SFRP1 | PIN1
4 genes	0.197818	STRN4 | HGF | SFRP1 | AKT2
4 genes	0.0173622	STRN4 | HGF | RB1 | PIN1
4 genes	0.00249367	STRN4 | HGF | RB1 | AKT2
4 genes	0.0179587	STRN4 | HGF | PIN1 | AKT2
4 genes	6.14264e-06	STRN4 | WWP1 | CASP2 | STAT1
4 genes	0.000206684	STRN4 | WWP1 | CASP2 | SNAI1
4 genes	1.32845e-05	STRN4 | WWP1 | CASP2 | SFRP1
4 genes	1.19079e-05	STRN4 | WWP1 | CASP2 | RB1
4 genes	3.98357e-05	STRN4 | WWP1 | CASP2 | PIN1
4 genes	0.000909777	STRN4 | WWP1 | CASP2 | AKT2
4 genes	4.19571e-05	STRN4 | WWP1 | STAT1 | SNAI1
4 genes	3.09703e-05	STRN4 | WWP1 | STAT1 | SFRP1
4 genes	2.26523e-08	STRN4 | WWP1 | STAT1 | RB1
4 genes	1.8762e-06	STRN4 | WWP1 | STAT1 | PIN1
4 genes	2.40878e-05	STRN4 | WWP1 | STAT1 | AKT2
4 genes	0.00484096	STRN4 | WWP1 | SNAI1 | SFRP1
4 genes	0.00225735	STRN4 | WWP1 | SNAI1 | RB1
4 genes	0.000986199	STRN4 | WWP1 | SNAI1 | PIN1
4 genes	0.0107573	STRN4 | WWP1 | SNAI1 | AKT2
4 genes	0.0158521	STRN4 | WWP1 | SFRP1 | RB1
4 genes	0.0997169	STRN4 | WWP1 | SFRP1 | PIN1
4 genes	0.0554599	STRN4 | WWP1 | SFRP1 | AKT2
4 genes	0.00324593	STRN4 | WWP1 | RB1 | PIN1
4 genes	0.00394684	STRN4 | WWP1 | RB1 | AKT2
4 genes	0.02872	STRN4 | WWP1 | PIN1 | AKT2
4 genes	0.00663328	STRN4 | CASP2 | STAT1 | SNAI1
4 genes	0.000267343	STRN4 | CASP2 | STAT1 | SFRP1
4 genes	4.58369e-08	STRN4 | CASP2 | STAT1 | RB1
4 genes	0.000269002	STRN4 | CASP2 | STAT1 | PIN1
4 genes	6.50072e-05	STRN4 | CASP2 | STAT1 | AKT2
4 genes	0.00147742	STRN4 | CASP2 | SNAI1 | SFRP1
4 genes	2.96068e-05	STRN4 | CASP2 | SNAI1 | RB1
4 genes	0.00178626	STRN4 | CASP2 | SNAI1 | PIN1
4 genes	0.00111675	STRN4 | CASP2 | SNAI1 | AKT2
4 genes	6.98505e-06	STRN4 | CASP2 | SFRP1 | RB1
4 genes	0.000641807	STRN4 | CASP2 | SFRP1 | PIN1
4 genes	0.00926439	STRN4 | CASP2 | SFRP1 | AKT2
4 genes	4.02883e-05	STRN4 | CASP2 | RB1 | PIN1
4 genes	2.34298e-05	STRN4 | CASP2 | RB1 | AKT2
4 genes	0.00231916	STRN4 | CASP2 | PIN1 | AKT2
4 genes	0.000513208	STRN4 | STAT1 | SNAI1 | SFRP1
4 genes	1.51585e-06	STRN4 | STAT1 | SNAI1 | RB1
4 genes	0.000620521	STRN4 | STAT1 | SNAI1 | PIN1
4 genes	0.000541468	STRN4 | STAT1 | SNAI1 | AKT2
4 genes	0.000133159	STRN4 | STAT1 | SFRP1 | RB1
4 genes	0.000394161	STRN4 | STAT1 | SFRP1 | PIN1
4 genes	0.000228142	STRN4 | STAT1 | SFRP1 | AKT2
4 genes	7.09633e-05	STRN4 | STAT1 | RB1 | PIN1
4 genes	4.91265e-06	STRN4 | STAT1 | RB1 | AKT2
4 genes	7.08807e-05	STRN4 | STAT1 | PIN1 | AKT2
4 genes	0.00849889	STRN4 | SNAI1 | SFRP1 | RB1
4 genes	0.017322	STRN4 | SNAI1 | SFRP1 | PIN1
4 genes	0.0663549	STRN4 | SNAI1 | SFRP1 | AKT2
4 genes	0.00402082	STRN4 | SNAI1 | RB1 | PIN1
4 genes	0.000210865	STRN4 | SNAI1 | RB1 | AKT2
4 genes	0.0101478	STRN4 | SNAI1 | PIN1 | AKT2
4 genes	0.107795	STRN4 | SFRP1 | RB1 | PIN1
4 genes	0.0203532	STRN4 | SFRP1 | RB1 | AKT2
4 genes	0.0862503	STRN4 | SFRP1 | PIN1 | AKT2
4 genes	0.0252095	STRN4 | RB1 | PIN1 | AKT2
4 genes	0.000411972	HGF | WWP1 | CASP2 | STAT1
4 genes	0.00366838	HGF | WWP1 | CASP2 | SNAI1
4 genes	8.26143e-05	HGF | WWP1 | CASP2 | SFRP1
4 genes	3.28443e-05	HGF | WWP1 | CASP2 | RB1
4 genes	0.00145666	HGF | WWP1 | CASP2 | PIN1
4 genes	0.000254608	HGF | WWP1 | CASP2 | AKT2
4 genes	0.000981913	HGF | WWP1 | STAT1 | SNAI1
4 genes	7.22282e-05	HGF | WWP1 | STAT1 | SFRP1
4 genes	5.36675e-09	HGF | WWP1 | STAT1 | RB1
4 genes	7.18196e-05	HGF | WWP1 | STAT1 | PIN1
4 genes	1.18329e-06	HGF | WWP1 | STAT1 | AKT2
4 genes	0.00973382	HGF | WWP1 | SNAI1 | SFRP1
4 genes	0.00194274	HGF | WWP1 | SNAI1 | RB1
4 genes	0.0136095	HGF | WWP1 | SNAI1 | PIN1
4 genes	0.0268356	HGF | WWP1 | SNAI1 | AKT2
4 genes	0.0126953	HGF | WWP1 | SFRP1 | RB1
4 genes	0.00801857	HGF | WWP1 | SFRP1 | PIN1
4 genes	0.082246	HGF | WWP1 | SFRP1 | AKT2
4 genes	0.00922683	HGF | WWP1 | RB1 | PIN1
4 genes	0.0218574	HGF | WWP1 | RB1 | AKT2
4 genes	0.0198008	HGF | WWP1 | PIN1 | AKT2
4 genes	0.021314	HGF | CASP2 | STAT1 | SNAI1
4 genes	0.0138485	HGF | CASP2 | STAT1 | SFRP1
4 genes	5.03158e-05	HGF | CASP2 | STAT1 | RB1
4 genes	0.00168378	HGF | CASP2 | STAT1 | PIN1
4 genes	0.00110244	HGF | CASP2 | STAT1 | AKT2
4 genes	0.0036166	HGF | CASP2 | SNAI1 | SFRP1
4 genes	0.000121754	HGF | CASP2 | SNAI1 | RB1
4 genes	0.0240994	HGF | CASP2 | SNAI1 | PIN1
4 genes	0.00340483	HGF | CASP2 | SNAI1 | AKT2
4 genes	0.000836824	HGF | CASP2 | SFRP1 | RB1
4 genes	0.00127132	HGF | CASP2 | SFRP1 | PIN1
4 genes	0.00198938	HGF | CASP2 | SFRP1 | AKT2
4 genes	0.0041214	HGF | CASP2 | RB1 | PIN1
4 genes	0.000119238	HGF | CASP2 | RB1 | AKT2
4 genes	0.00713283	HGF | CASP2 | PIN1 | AKT2
4 genes	0.00781054	HGF | STAT1 | SNAI1 | SFRP1
4 genes	4.16283e-06	HGF | STAT1 | SNAI1 | RB1
4 genes	0.000233346	HGF | STAT1 | SNAI1 | PIN1
4 genes	0.000148327	HGF | STAT1 | SNAI1 | AKT2
4 genes	0.000304273	HGF | STAT1 | SFRP1 | RB1
4 genes	0.00210855	HGF | STAT1 | SFRP1 | PIN1
4 genes	0.00329763	HGF | STAT1 | SFRP1 | AKT2
4 genes	2.69847e-05	HGF | STAT1 | RB1 | PIN1
4 genes	6.05203e-05	HGF | STAT1 | RB1 | AKT2
4 genes	5.25957e-05	HGF | STAT1 | PIN1 | AKT2
4 genes	0.00547456	HGF | SNAI1 | SFRP1 | RB1
4 genes	0.134601	HGF | SNAI1 | SFRP1 | PIN1
4 genes	0.080902	HGF | SNAI1 | SFRP1 | AKT2
4 genes	0.00741883	HGF | SNAI1 | RB1 | PIN1
4 genes	0.000547325	HGF | SNAI1 | RB1 | AKT2
4 genes	0.0834105	HGF | SNAI1 | PIN1 | AKT2
4 genes	0.0057571	HGF | SFRP1 | RB1 | PIN1
4 genes	0.00157744	HGF | SFRP1 | RB1 | AKT2
4 genes	0.0306662	HGF | SFRP1 | PIN1 | AKT2
4 genes	0.0227666	HGF | RB1 | PIN1 | AKT2
4 genes	3.92099e-05	WWP1 | CASP2 | STAT1 | SNAI1
4 genes	3.8835e-05	WWP1 | CASP2 | STAT1 | SFRP1
4 genes	4.4785e-08	WWP1 | CASP2 | STAT1 | RB1
4 genes	6.70776e-05	WWP1 | CASP2 | STAT1 | PIN1
4 genes	9.78633e-06	WWP1 | CASP2 | STAT1 | AKT2
4 genes	0.00074243	WWP1 | CASP2 | SNAI1 | SFRP1
4 genes	1.27436e-06	WWP1 | CASP2 | SNAI1 | RB1
4 genes	0.00121517	WWP1 | CASP2 | SNAI1 | PIN1
4 genes	0.00149636	WWP1 | CASP2 | SNAI1 | AKT2
4 genes	1.27856e-05	WWP1 | CASP2 | SFRP1 | RB1
4 genes	0.000307297	WWP1 | CASP2 | SFRP1 | PIN1
4 genes	0.000203843	WWP1 | CASP2 | SFRP1 | AKT2
4 genes	0.000337669	WWP1 | CASP2 | RB1 | PIN1
4 genes	4.38451e-05	WWP1 | CASP2 | RB1 | AKT2
4 genes	0.00244094	WWP1 | CASP2 | PIN1 | AKT2
4 genes	0.000926056	WWP1 | STAT1 | SNAI1 | SFRP1
4 genes	8.5491e-08	WWP1 | STAT1 | SNAI1 | RB1
4 genes	0.000201337	WWP1 | STAT1 | SNAI1 | PIN1
4 genes	4.33789e-06	WWP1 | STAT1 | SNAI1 | AKT2
4 genes	5.16677e-06	WWP1 | STAT1 | SFRP1 | RB1
4 genes	5.58862e-05	WWP1 | STAT1 | SFRP1 | PIN1
4 genes	7.68579e-07	WWP1 | STAT1 | SFRP1 | AKT2
4 genes	1.9445e-07	WWP1 | STAT1 | RB1 | PIN1
4 genes	4.28849e-09	WWP1 | STAT1 | RB1 | AKT2
4 genes	1.42519e-06	WWP1 | STAT1 | PIN1 | AKT2
4 genes	0.00908537	WWP1 | SNAI1 | SFRP1 | RB1
4 genes	0.0124325	WWP1 | SNAI1 | SFRP1 | PIN1
4 genes	0.013133	WWP1 | SNAI1 | SFRP1 | AKT2
4 genes	0.00297953	WWP1 | SNAI1 | RB1 | PIN1
4 genes	0.000228762	WWP1 | SNAI1 | RB1 | AKT2
4 genes	0.0397703	WWP1 | SNAI1 | PIN1 | AKT2
4 genes	0.00673802	WWP1 | SFRP1 | RB1 | PIN1
4 genes	0.001155	WWP1 | SFRP1 | RB1 | AKT2
4 genes	0.127873	WWP1 | SFRP1 | PIN1 | AKT2
4 genes	0.0147156	WWP1 | RB1 | PIN1 | AKT2
4 genes	0.0321463	CASP2 | STAT1 | SNAI1 | SFRP1
4 genes	7.54937e-05	CASP2 | STAT1 | SNAI1 | RB1
4 genes	0.00244981	CASP2 | STAT1 | SNAI1 | PIN1
4 genes	5.23562e-05	CASP2 | STAT1 | SNAI1 | AKT2
4 genes	9.24277e-05	CASP2 | STAT1 | SFRP1 | RB1
4 genes	0.00119197	CASP2 | STAT1 | SFRP1 | PIN1
4 genes	0.000752454	CASP2 | STAT1 | SFRP1 | AKT2
4 genes	3.49236e-05	CASP2 | STAT1 | RB1 | PIN1
4 genes	1.14589e-07	CASP2 | STAT1 | RB1 | AKT2
4 genes	8.07751e-05	CASP2 | STAT1 | PIN1 | AKT2
4 genes	0.000229196	CASP2 | SNAI1 | SFRP1 | RB1
4 genes	0.0457181	CASP2 | SNAI1 | SFRP1 | PIN1
4 genes	0.0525696	CASP2 | SNAI1 | SFRP1 | AKT2
4 genes	0.00127702	CASP2 | SNAI1 | RB1 | PIN1
4 genes	0.000158451	CASP2 | SNAI1 | RB1 | AKT2
4 genes	0.0330364	CASP2 | SNAI1 | PIN1 | AKT2
4 genes	0.00142367	CASP2 | SFRP1 | RB1 | PIN1
4 genes	7.07946e-05	CASP2 | SFRP1 | RB1 | AKT2
4 genes	0.0427627	CASP2 | SFRP1 | PIN1 | AKT2
4 genes	0.000406229	CASP2 | RB1 | PIN1 | AKT2
4 genes	3.77092e-05	STAT1 | SNAI1 | SFRP1 | RB1
4 genes	2.09342e-05	STAT1 | SNAI1 | SFRP1 | PIN1
4 genes	0.000368152	STAT1 | SNAI1 | SFRP1 | AKT2
4 genes	9.57833e-06	STAT1 | SNAI1 | RB1 | PIN1
4 genes	4.2563e-07	STAT1 | SNAI1 | RB1 | AKT2
4 genes	0.000541754	STAT1 | SNAI1 | PIN1 | AKT2
4 genes	3.44737e-05	STAT1 | SFRP1 | RB1 | PIN1
4 genes	3.10437e-05	STAT1 | SFRP1 | RB1 | AKT2
4 genes	0.00109894	STAT1 | SFRP1 | PIN1 | AKT2
4 genes	4.90639e-05	STAT1 | RB1 | PIN1 | AKT2
4 genes	0.001506	SNAI1 | SFRP1 | RB1 | PIN1
4 genes	0.000953647	SNAI1 | SFRP1 | RB1 | AKT2
4 genes	0.255462	SNAI1 | SFRP1 | PIN1 | AKT2
4 genes	0.000631999	SNAI1 | RB1 | PIN1 | AKT2
4 genes	0.0478995	SFRP1 | RB1 | PIN1 | AKT2
5 genes	3.10021e-07	STRN4 | HGF | WWP1 | CASP2 | STAT1
5 genes	1.22739e-05	STRN4 | HGF | WWP1 | CASP2 | SNAI1
5 genes	3.68526e-05	STRN4 | HGF | WWP1 | CASP2 | SFRP1
5 genes	3.67619e-05	STRN4 | HGF | WWP1 | CASP2 | RB1
5 genes	2.19798e-05	STRN4 | HGF | WWP1 | CASP2 | PIN1
5 genes	1.83136e-05	STRN4 | HGF | WWP1 | CASP2 | AKT2
5 genes	0.00011834	STRN4 | HGF | WWP1 | STAT1 | SNAI1
5 genes	3.19852e-06	STRN4 | HGF | WWP1 | STAT1 | SFRP1
5 genes	1.9624e-07	STRN4 | HGF | WWP1 | STAT1 | RB1
5 genes	5.11316e-07	STRN4 | HGF | WWP1 | STAT1 | PIN1
5 genes	1.21426e-06	STRN4 | HGF | WWP1 | STAT1 | AKT2
5 genes	0.0459339	STRN4 | HGF | WWP1 | SNAI1 | SFRP1
5 genes	0.00118121	STRN4 | HGF | WWP1 | SNAI1 | RB1
5 genes	0.00877175	STRN4 | HGF | WWP1 | SNAI1 | PIN1
5 genes	0.0624479	STRN4 | HGF | WWP1 | SNAI1 | AKT2
5 genes	0.021866	STRN4 | HGF | WWP1 | SFRP1 | RB1
5 genes	0.0492994	STRN4 | HGF | WWP1 | SFRP1 | PIN1
5 genes	0.122626	STRN4 | HGF | WWP1 | SFRP1 | AKT2
5 genes	0.0100482	STRN4 | HGF | WWP1 | RB1 | PIN1
5 genes	0.0154145	STRN4 | HGF | WWP1 | RB1 | AKT2
5 genes	0.0330367	STRN4 | HGF | WWP1 | PIN1 | AKT2
5 genes	0.000901635	STRN4 | HGF | CASP2 | STAT1 | SNAI1
5 genes	0.00499917	STRN4 | HGF | CASP2 | STAT1 | SFRP1
5 genes	2.08908e-08	STRN4 | HGF | CASP2 | STAT1 | RB1
5 genes	6.11251e-05	STRN4 | HGF | CASP2 | STAT1 | PIN1
5 genes	0.000974033	STRN4 | HGF | CASP2 | STAT1 | AKT2
5 genes	0.00240098	STRN4 | HGF | CASP2 | SNAI1 | SFRP1
5 genes	8.28702e-05	STRN4 | HGF | CASP2 | SNAI1 | RB1
5 genes	0.00471885	STRN4 | HGF | CASP2 | SNAI1 | PIN1
5 genes	0.00824357	STRN4 | HGF | CASP2 | SNAI1 | AKT2
5 genes	7.25088e-05	STRN4 | HGF | CASP2 | SFRP1 | RB1
5 genes	0.000119134	STRN4 | HGF | CASP2 | SFRP1 | PIN1
5 genes	0.0115253	STRN4 | HGF | CASP2 | SFRP1 | AKT2
5 genes	3.55913e-05	STRN4 | HGF | CASP2 | RB1 | PIN1
5 genes	5.35686e-05	STRN4 | HGF | CASP2 | RB1 | AKT2
5 genes	0.00730483	STRN4 | HGF | CASP2 | PIN1 | AKT2
5 genes	0.000586888	STRN4 | HGF | STAT1 | SNAI1 | SFRP1
5 genes	4.01048e-05	STRN4 | HGF | STAT1 | SNAI1 | RB1
5 genes	5.60073e-05	STRN4 | HGF | STAT1 | SNAI1 | PIN1
5 genes	0.000231934	STRN4 | HGF | STAT1 | SNAI1 | AKT2
5 genes	8.17941e-06	STRN4 | HGF | STAT1 | SFRP1 | RB1
5 genes	0.00544656	STRN4 | HGF | STAT1 | SFRP1 | PIN1
5 genes	0.00257916	STRN4 | HGF | STAT1 | SFRP1 | AKT2
5 genes	2.46795e-06	STRN4 | HGF | STAT1 | RB1 | PIN1
5 genes	1.19921e-05	STRN4 | HGF | STAT1 | RB1 | AKT2
5 genes	0.000129397	STRN4 | HGF | STAT1 | PIN1 | AKT2
5 genes	0.00115954	STRN4 | HGF | SNAI1 | SFRP1 | RB1
5 genes	0.0065609	STRN4 | HGF | SNAI1 | SFRP1 | PIN1
5 genes	0.0607717	STRN4 | HGF | SNAI1 | SFRP1 | AKT2
5 genes	0.00303215	STRN4 | HGF | SNAI1 | RB1 | PIN1
5 genes	0.00237301	STRN4 | HGF | SNAI1 | RB1 | AKT2
5 genes	0.00796931	STRN4 | HGF | SNAI1 | PIN1 | AKT2
5 genes	0.046204	STRN4 | HGF | SFRP1 | RB1 | PIN1
5 genes	0.00687577	STRN4 | HGF | SFRP1 | RB1 | AKT2
5 genes	0.0325799	STRN4 | HGF | SFRP1 | PIN1 | AKT2
5 genes	0.00426906	STRN4 | HGF | RB1 | PIN1 | AKT2
5 genes	2.7184e-05	STRN4 | WWP1 | CASP2 | STAT1 | SNAI1
5 genes	2.0529e-05	STRN4 | WWP1 | CASP2 | STAT1 | SFRP1
5 genes	1.73167e-09	STRN4 | WWP1 | CASP2 | STAT1 | RB1
5 genes	1.43349e-07	STRN4 | WWP1 | CASP2 | STAT1 | PIN1
5 genes	3.47283e-07	STRN4 | WWP1 | CASP2 | STAT1 | AKT2
5 genes	1.69299e-05	STRN4 | WWP1 | CASP2 | SNAI1 | SFRP1
5 genes	6.09193e-05	STRN4 | WWP1 | CASP2 | SNAI1 | RB1
5 genes	0.000453745	STRN4 | WWP1 | CASP2 | SNAI1 | PIN1
5 genes	0.000372051	STRN4 | WWP1 | CASP2 | SNAI1 | AKT2
5 genes	2.08956e-07	STRN4 | WWP1 | CASP2 | SFRP1 | RB1
5 genes	1.56254e-06	STRN4 | WWP1 | CASP2 | SFRP1 | PIN1
5 genes	1.11846e-05	STRN4 | WWP1 | CASP2 | SFRP1 | AKT2
5 genes	1.47036e-05	STRN4 | WWP1 | CASP2 | RB1 | PIN1
5 genes	5.86509e-07	STRN4 | WWP1 | CASP2 | RB1 | AKT2
5 genes	0.000184224	STRN4 | WWP1 | CASP2 | PIN1 | AKT2
5 genes	0.000259931	STRN4 | WWP1 | STAT1 | SNAI1 | SFRP1
5 genes	7.7243e-06	STRN4 | WWP1 | STAT1 | SNAI1 | RB1
5 genes	1.55603e-05	STRN4 | WWP1 | STAT1 | SNAI1 | PIN1
5 genes	1.71508e-05	STRN4 | WWP1 | STAT1 | SNAI1 | AKT2
5 genes	6.03056e-06	STRN4 | WWP1 | STAT1 | SFRP1 | RB1
5 genes	6.515e-05	STRN4 | WWP1 | STAT1 | SFRP1 | PIN1
5 genes	2.22944e-07	STRN4 | WWP1 | STAT1 | SFRP1 | AKT2
5 genes	6.31427e-08	STRN4 | WWP1 | STAT1 | RB1 | PIN1
5 genes	2.83197e-07	STRN4 | WWP1 | STAT1 | RB1 | AKT2
5 genes	1.45019e-06	STRN4 | WWP1 | STAT1 | PIN1 | AKT2
5 genes	0.000890397	STRN4 | WWP1 | SNAI1 | SFRP1 | RB1
5 genes	0.00478163	STRN4 | WWP1 | SNAI1 | SFRP1 | PIN1
5 genes	0.00216098	STRN4 | WWP1 | SNAI1 | SFRP1 | AKT2
5 genes	0.00389674	STRN4 | WWP1 | SNAI1 | RB1 | PIN1
5 genes	0.000734994	STRN4 | WWP1 | SNAI1 | RB1 | AKT2
5 genes	0.0130214	STRN4 | WWP1 | SNAI1 | PIN1 | AKT2
5 genes	0.0587092	STRN4 | WWP1 | SFRP1 | RB1 | PIN1
5 genes	0.037934	STRN4 | WWP1 | SFRP1 | RB1 | AKT2
5 genes	0.110423	STRN4 | WWP1 | SFRP1 | PIN1 | AKT2
5 genes	0.00428298	STRN4 | WWP1 | RB1 | PIN1 | AKT2
5 genes	0.000290054	STRN4 | CASP2 | STAT1 | SNAI1 | SFRP1
5 genes	5.604e-09	STRN4 | CASP2 | STAT1 | SNAI1 | RB1
5 genes	4.08892e-05	STRN4 | CASP2 | STAT1 | SNAI1 | PIN1
5 genes	9.49853e-05	STRN4 | CASP2 | STAT1 | SNAI1 | AKT2
5 genes	5.1714e-07	STRN4 | CASP2 | STAT1 | SFRP1 | RB1
5 genes	0.000152167	STRN4 | CASP2 | STAT1 | SFRP1 | PIN1
5 genes	0.000128253	STRN4 | CASP2 | STAT1 | SFRP1 | AKT2
5 genes	1.73308e-06	STRN4 | CASP2 | STAT1 | RB1 | PIN1
5 genes	1.48331e-08	STRN4 | CASP2 | STAT1 | RB1 | AKT2
5 genes	2.06199e-05	STRN4 | CASP2 | STAT1 | PIN1 | AKT2
5 genes	2.05271e-05	STRN4 | CASP2 | SNAI1 | SFRP1 | RB1
5 genes	0.00351429	STRN4 | CASP2 | SNAI1 | SFRP1 | PIN1
5 genes	0.00333191	STRN4 | CASP2 | SNAI1 | SFRP1 | AKT2
5 genes	6.04681e-06	STRN4 | CASP2 | SNAI1 | RB1 | PIN1
5 genes	1.19232e-05	STRN4 | CASP2 | SNAI1 | RB1 | AKT2
5 genes	0.00338958	STRN4 | CASP2 | SNAI1 | PIN1 | AKT2
5 genes	6.99284e-06	STRN4 | CASP2 | SFRP1 | RB1 | PIN1
5 genes	4.26261e-05	STRN4 | CASP2 | SFRP1 | RB1 | AKT2
5 genes	0.00352281	STRN4 | CASP2 | SFRP1 | PIN1 | AKT2
5 genes	0.000281854	STRN4 | CASP2 | RB1 | PIN1 | AKT2
5 genes	4.6773e-07	STRN4 | STAT1 | SNAI1 | SFRP1 | RB1
5 genes	0.000140479	STRN4 | STAT1 | SNAI1 | SFRP1 | PIN1
5 genes	6.69525e-05	STRN4 | STAT1 | SNAI1 | SFRP1 | AKT2
5 genes	4.01336e-07	STRN4 | STAT1 | SNAI1 | RB1 | PIN1
5 genes	3.01562e-07	STRN4 | STAT1 | SNAI1 | RB1 | AKT2
5 genes	0.00048035	STRN4 | STAT1 | SNAI1 | PIN1 | AKT2
5 genes	1.40717e-05	STRN4 | STAT1 | SFRP1 | RB1 | PIN1
5 genes	9.98136e-06	STRN4 | STAT1 | SFRP1 | RB1 | AKT2
5 genes	5.84464e-05	STRN4 | STAT1 | SFRP1 | PIN1 | AKT2
5 genes	1.0847e-06	STRN4 | STAT1 | RB1 | PIN1 | AKT2
5 genes	0.0135687	STRN4 | SNAI1 | SFRP1 | RB1 | PIN1
5 genes	0.00261801	STRN4 | SNAI1 | SFRP1 | RB1 | AKT2
5 genes	0.0156765	STRN4 | SNAI1 | SFRP1 | PIN1 | AKT2
5 genes	0.00426948	STRN4 | SNAI1 | RB1 | PIN1 | AKT2
5 genes	0.110561	STRN4 | SFRP1 | RB1 | PIN1 | AKT2
5 genes	2.66443e-05	HGF | WWP1 | CASP2 | STAT1 | SNAI1
5 genes	5.2148e-05	HGF | WWP1 | CASP2 | STAT1 | SFRP1
5 genes	3.17366e-08	HGF | WWP1 | CASP2 | STAT1 | RB1
5 genes	9.72893e-05	HGF | WWP1 | CASP2 | STAT1 | PIN1
5 genes	3.6901e-06	HGF | WWP1 | CASP2 | STAT1 | AKT2
5 genes	1.06026e-05	HGF | WWP1 | CASP2 | SNAI1 | SFRP1
5 genes	6.84165e-06	HGF | WWP1 | CASP2 | SNAI1 | RB1
5 genes	0.000134694	HGF | WWP1 | CASP2 | SNAI1 | PIN1
5 genes	0.000368627	HGF | WWP1 | CASP2 | SNAI1 | AKT2
5 genes	2.33561e-05	HGF | WWP1 | CASP2 | SFRP1 | RB1
5 genes	0.000457331	HGF | WWP1 | CASP2 | SFRP1 | PIN1
5 genes	9.06864e-05	HGF | WWP1 | CASP2 | SFRP1 | AKT2
5 genes	1.49225e-05	HGF | WWP1 | CASP2 | RB1 | PIN1
5 genes	8.15392e-05	HGF | WWP1 | CASP2 | RB1 | AKT2
5 genes	0.00334483	HGF | WWP1 | CASP2 | PIN1 | AKT2
5 genes	0.000348256	HGF | WWP1 | STAT1 | SNAI1 | SFRP1
5 genes	2.07186e-08	HGF | WWP1 | STAT1 | SNAI1 | RB1
5 genes	8.62516e-06	HGF | WWP1 | STAT1 | SNAI1 | PIN1
5 genes	4.40436e-06	HGF | WWP1 | STAT1 | SNAI1 | AKT2
5 genes	1.17434e-05	HGF | WWP1 | STAT1 | SFRP1 | RB1
5 genes	3.53246e-05	HGF | WWP1 | STAT1 | SFRP1 | PIN1
5 genes	1.68579e-06	HGF | WWP1 | STAT1 | SFRP1 | AKT2
5 genes	6.61294e-08	HGF | WWP1 | STAT1 | RB1 | PIN1
5 genes	5.32071e-09	HGF | WWP1 | STAT1 | RB1 | AKT2
5 genes	1.54572e-07	HGF | WWP1 | STAT1 | PIN1 | AKT2
5 genes	0.00253654	HGF | WWP1 | SNAI1 | SFRP1 | RB1
5 genes	0.0404018	HGF | WWP1 | SNAI1 | SFRP1 | PIN1
5 genes	0.0890927	HGF | WWP1 | SNAI1 | SFRP1 | AKT2
5 genes	0.00245421	HGF | WWP1 | SNAI1 | RB1 | PIN1
5 genes	0.0028561	HGF | WWP1 | SNAI1 | RB1 | AKT2
5 genes	0.0225527	HGF | WWP1 | SNAI1 | PIN1 | AKT2
5 genes	0.00242582	HGF | WWP1 | SFRP1 | RB1 | PIN1
5 genes	0.00560513	HGF | WWP1 | SFRP1 | RB1 | AKT2
5 genes	0.0153717	HGF | WWP1 | SFRP1 | PIN1 | AKT2
5 genes	0.0128393	HGF | WWP1 | RB1 | PIN1 | AKT2
5 genes	0.0067255	HGF | CASP2 | STAT1 | SNAI1 | SFRP1
5 genes	2.84722e-06	HGF | CASP2 | STAT1 | SNAI1 | RB1
5 genes	0.00127565	HGF | CASP2 | STAT1 | SNAI1 | PIN1
5 genes	0.000240141	HGF | CASP2 | STAT1 | SNAI1 | AKT2
5 genes	0.000266685	HGF | CASP2 | STAT1 | SFRP1 | RB1
5 genes	0.00177244	HGF | CASP2 | STAT1 | SFRP1 | PIN1
5 genes	0.000238956	HGF | CASP2 | STAT1 | SFRP1 | AKT2
5 genes	5.14174e-05	HGF | CASP2 | STAT1 | RB1 | PIN1
5 genes	4.09475e-06	HGF | CASP2 | STAT1 | RB1 | AKT2
5 genes	9.19684e-06	HGF | CASP2 | STAT1 | PIN1 | AKT2
5 genes	7.97055e-05	HGF | CASP2 | SNAI1 | SFRP1 | RB1
5 genes	0.00859942	HGF | CASP2 | SNAI1 | SFRP1 | PIN1
5 genes	0.0162391	HGF | CASP2 | SNAI1 | SFRP1 | AKT2
5 genes	0.00113172	HGF | CASP2 | SNAI1 | RB1 | PIN1
5 genes	0.000121216	HGF | CASP2 | SNAI1 | RB1 | AKT2
5 genes	0.00487832	HGF | CASP2 | SNAI1 | PIN1 | AKT2
5 genes	6.99026e-05	HGF | CASP2 | SFRP1 | RB1 | PIN1
5 genes	1.21298e-05	HGF | CASP2 | SFRP1 | RB1 | AKT2
5 genes	0.00426059	HGF | CASP2 | SFRP1 | PIN1 | AKT2
5 genes	0.000558393	HGF | CASP2 | RB1 | PIN1 | AKT2
5 genes	2.46747e-06	HGF | STAT1 | SNAI1 | SFRP1 | RB1
5 genes	1.57756e-05	HGF | STAT1 | SNAI1 | SFRP1 | PIN1
5 genes	0.000225074	HGF | STAT1 | SNAI1 | SFRP1 | AKT2
5 genes	9.32579e-07	HGF | STAT1 | SNAI1 | RB1 | PIN1
5 genes	2.59045e-07	HGF | STAT1 | SNAI1 | RB1 | AKT2
5 genes	4.64361e-05	HGF | STAT1 | SNAI1 | PIN1 | AKT2
5 genes	3.48708e-05	HGF | STAT1 | SFRP1 | RB1 | PIN1
5 genes	2.56764e-05	HGF | STAT1 | SFRP1 | RB1 | AKT2
5 genes	0.000566111	HGF | STAT1 | SFRP1 | PIN1 | AKT2
5 genes	3.78202e-06	HGF | STAT1 | RB1 | PIN1 | AKT2
5 genes	0.0116441	HGF | SNAI1 | SFRP1 | RB1 | PIN1
5 genes	0.000409261	HGF | SNAI1 | SFRP1 | RB1 | AKT2
5 genes	0.25847	HGF | SNAI1 | SFRP1 | PIN1 | AKT2
5 genes	0.00312985	HGF | SNAI1 | RB1 | PIN1 | AKT2
5 genes	0.00468715	HGF | SFRP1 | RB1 | PIN1 | AKT2
5 genes	2.12692e-05	WWP1 | CASP2 | STAT1 | SNAI1 | SFRP1
5 genes	1.48453e-06	WWP1 | CASP2 | STAT1 | SNAI1 | RB1
5 genes	7.39156e-05	WWP1 | CASP2 | STAT1 | SNAI1 | PIN1
5 genes	1.77853e-06	WWP1 | CASP2 | STAT1 | SNAI1 | AKT2
5 genes	1.38462e-07	WWP1 | CASP2 | STAT1 | SFRP1 | RB1
5 genes	3.42417e-06	WWP1 | CASP2 | STAT1 | SFRP1 | PIN1
5 genes	1.05889e-07	WWP1 | CASP2 | STAT1 | SFRP1 | AKT2
5 genes	2.87005e-08	WWP1 | CASP2 | STAT1 | RB1 | PIN1
5 genes	4.43571e-08	WWP1 | CASP2 | STAT1 | RB1 | AKT2
5 genes	5.29233e-06	WWP1 | CASP2 | STAT1 | PIN1 | AKT2
5 genes	9.64333e-06	WWP1 | CASP2 | SNAI1 | SFRP1 | RB1
5 genes	8.40731e-05	WWP1 | CASP2 | SNAI1 | SFRP1 | PIN1
5 genes	3.90561e-05	WWP1 | CASP2 | SNAI1 | SFRP1 | AKT2
5 genes	7.38757e-05	WWP1 | CASP2 | SNAI1 | RB1 | PIN1
5 genes	6.90917e-05	WWP1 | CASP2 | SNAI1 | RB1 | AKT2
5 genes	0.00695862	WWP1 | CASP2 | SNAI1 | PIN1 | AKT2
5 genes	0.000143372	WWP1 | CASP2 | SFRP1 | RB1 | PIN1
5 genes	3.28809e-05	WWP1 | CASP2 | SFRP1 | RB1 | AKT2
5 genes	0.000433873	WWP1 | CASP2 | SFRP1 | PIN1 | AKT2
5 genes	0.000213058	WWP1 | CASP2 | RB1 | PIN1 | AKT2
5 genes	8.71542e-08	WWP1 | STAT1 | SNAI1 | SFRP1 | RB1
5 genes	2.06415e-05	WWP1 | STAT1 | SNAI1 | SFRP1 | PIN1
5 genes	3.77281e-06	WWP1 | STAT1 | SNAI1 | SFRP1 | AKT2
5 genes	1.34145e-07	WWP1 | STAT1 | SNAI1 | RB1 | PIN1
5 genes	4.35618e-07	WWP1 | STAT1 | SNAI1 | RB1 | AKT2
5 genes	1.65388e-06	WWP1 | STAT1 | SNAI1 | PIN1 | AKT2
5 genes	1.14538e-06	WWP1 | STAT1 | SFRP1 | RB1 | PIN1
5 genes	1.61578e-07	WWP1 | STAT1 | SFRP1 | RB1 | AKT2
5 genes	4.13107e-07	WWP1 | STAT1 | SFRP1 | PIN1 | AKT2
5 genes	2.0501e-08	WWP1 | STAT1 | RB1 | PIN1 | AKT2
5 genes	0.00747245	WWP1 | SNAI1 | SFRP1 | RB1 | PIN1
5 genes	0.000231992	WWP1 | SNAI1 | SFRP1 | RB1 | AKT2
5 genes	0.00842122	WWP1 | SNAI1 | SFRP1 | PIN1 | AKT2
5 genes	0.00296434	WWP1 | SNAI1 | RB1 | PIN1 | AKT2
5 genes	0.00514518	WWP1 | SFRP1 | RB1 | PIN1 | AKT2
5 genes	2.16353e-06	CASP2 | STAT1 | SNAI1 | SFRP1 | RB1
5 genes	0.000625747	CASP2 | STAT1 | SNAI1 | SFRP1 | PIN1
5 genes	4.3641e-05	CASP2 | STAT1 | SNAI1 | SFRP1 | AKT2
5 genes	6.56878e-07	CASP2 | STAT1 | SNAI1 | RB1 | PIN1
5 genes	8.42958e-07	CASP2 | STAT1 | SNAI1 | RB1 | AKT2
5 genes	1.13232e-05	CASP2 | STAT1 | SNAI1 | PIN1 | AKT2
5 genes	5.18369e-05	CASP2 | STAT1 | SFRP1 | RB1 | PIN1
5 genes	1.42604e-06	CASP2 | STAT1 | SFRP1 | RB1 | AKT2
5 genes	4.68275e-06	CASP2 | STAT1 | SFRP1 | PIN1 | AKT2
5 genes	1.71854e-05	CASP2 | STAT1 | RB1 | PIN1 | AKT2
5 genes	0.000505973	CASP2 | SNAI1 | SFRP1 | RB1 | PIN1
5 genes	7.59597e-05	CASP2 | SNAI1 | SFRP1 | RB1 | AKT2
5 genes	0.0720187	CASP2 | SNAI1 | SFRP1 | PIN1 | AKT2
5 genes	0.000135673	CASP2 | SNAI1 | RB1 | PIN1 | AKT2
5 genes	0.000369312	CASP2 | SFRP1 | RB1 | PIN1 | AKT2
5 genes	2.9823e-07	STAT1 | SNAI1 | SFRP1 | RB1 | PIN1
5 genes	3.66782e-10	STAT1 | SNAI1 | SFRP1 | RB1 | AKT2
5 genes	5.13908e-05	STAT1 | SNAI1 | SFRP1 | PIN1 | AKT2
5 genes	7.5523e-07	STAT1 | SNAI1 | RB1 | PIN1 | AKT2
5 genes	1.50921e-05	STAT1 | SFRP1 | RB1 | PIN1 | AKT2
5 genes	0.0037177	SNAI1 | SFRP1 | RB1 | PIN1 | AKT2
6 genes	1.70679e-05	STRN4 | HGF | WWP1 | CASP2 | STAT1 | SNAI1
6 genes	4.46993e-06	STRN4 | HGF | WWP1 | CASP2 | STAT1 | SFRP1
6 genes	8.92071e-09	STRN4 | HGF | WWP1 | CASP2 | STAT1 | RB1
6 genes	1.09511e-06	STRN4 | HGF | WWP1 | CASP2 | STAT1 | PIN1
6 genes	3.19175e-06	STRN4 | HGF | WWP1 | CASP2 | STAT1 | AKT2
6 genes	5.58039e-05	STRN4 | HGF | WWP1 | CASP2 | SNAI1 | SFRP1
6 genes	4.51357e-05	STRN4 | HGF | WWP1 | CASP2 | SNAI1 | RB1
6 genes	0.000408082	STRN4 | HGF | WWP1 | CASP2 | SNAI1 | PIN1
6 genes	0.000455207	STRN4 | HGF | WWP1 | CASP2 | SNAI1 | AKT2
6 genes	3.15641e-06	STRN4 | HGF | WWP1 | CASP2 | SFRP1 | RB1
6 genes	3.73986e-06	STRN4 | HGF | WWP1 | CASP2 | SFRP1 | PIN1
6 genes	1.08342e-05	STRN4 | HGF | WWP1 | CASP2 | SFRP1 | AKT2
6 genes	3.06678e-05	STRN4 | HGF | WWP1 | CASP2 | RB1 | PIN1
6 genes	2.59611e-06	STRN4 | HGF | WWP1 | CASP2 | RB1 | AKT2
6 genes	0.00115736	STRN4 | HGF | WWP1 | CASP2 | PIN1 | AKT2
6 genes	2.11959e-06	STRN4 | HGF | WWP1 | STAT1 | SNAI1 | SFRP1
6 genes	4.20546e-07	STRN4 | HGF | WWP1 | STAT1 | SNAI1 | RB1
6 genes	7.6166e-06	STRN4 | HGF | WWP1 | STAT1 | SNAI1 | PIN1
6 genes	2.37057e-06	STRN4 | HGF | WWP1 | STAT1 | SNAI1 | AKT2
6 genes	5.57274e-09	STRN4 | HGF | WWP1 | STAT1 | SFRP1 | RB1
6 genes	1.34532e-05	STRN4 | HGF | WWP1 | STAT1 | SFRP1 | PIN1
6 genes	3.05894e-07	STRN4 | HGF | WWP1 | STAT1 | SFRP1 | AKT2
6 genes	7.00891e-08	STRN4 | HGF | WWP1 | STAT1 | RB1 | PIN1
6 genes	6.07725e-07	STRN4 | HGF | WWP1 | STAT1 | RB1 | AKT2
6 genes	1.41956e-06	STRN4 | HGF | WWP1 | STAT1 | PIN1 | AKT2
6 genes	0.00901109	STRN4 | HGF | WWP1 | SNAI1 | SFRP1 | RB1
6 genes	0.0162503	STRN4 | HGF | WWP1 | SNAI1 | SFRP1 | PIN1
6 genes	0.0475869	STRN4 | HGF | WWP1 | SNAI1 | SFRP1 | AKT2
6 genes	0.00595171	STRN4 | HGF | WWP1 | SNAI1 | RB1 | PIN1
6 genes	0.00228186	STRN4 | HGF | WWP1 | SNAI1 | RB1 | AKT2
6 genes	0.00550511	STRN4 | HGF | WWP1 | SNAI1 | PIN1 | AKT2
6 genes	0.0136049	STRN4 | HGF | WWP1 | SFRP1 | RB1 | PIN1
6 genes	0.0117968	STRN4 | HGF | WWP1 | SFRP1 | RB1 | AKT2
6 genes	0.0913668	STRN4 | HGF | WWP1 | SFRP1 | PIN1 | AKT2
6 genes	0.0132658	STRN4 | HGF | WWP1 | RB1 | PIN1 | AKT2
6 genes	0.00423809	STRN4 | HGF | CASP2 | STAT1 | SNAI1 | SFRP1
6 genes	1.96171e-08	STRN4 | HGF | CASP2 | STAT1 | SNAI1 | RB1
6 genes	5.8156e-05	STRN4 | HGF | CASP2 | STAT1 | SNAI1 | PIN1
6 genes	0.00108221	STRN4 | HGF | CASP2 | STAT1 | SNAI1 | AKT2
6 genes	4.78254e-07	STRN4 | HGF | CASP2 | STAT1 | SFRP1 | RB1
6 genes	0.000130065	STRN4 | HGF | CASP2 | STAT1 | SFRP1 | PIN1
6 genes	0.00445201	STRN4 | HGF | CASP2 | STAT1 | SFRP1 | AKT2
6 genes	1.49705e-06	STRN4 | HGF | CASP2 | STAT1 | RB1 | PIN1
6 genes	6.04625e-08	STRN4 | HGF | CASP2 | STAT1 | RB1 | AKT2
6 genes	1.01067e-05	STRN4 | HGF | CASP2 | STAT1 | PIN1 | AKT2
6 genes	0.000620933	STRN4 | HGF | CASP2 | SNAI1 | SFRP1 | RB1
6 genes	0.00101573	STRN4 | HGF | CASP2 | SNAI1 | SFRP1 | PIN1
6 genes	0.000688706	STRN4 | HGF | CASP2 | SNAI1 | SFRP1 | AKT2
6 genes	1.80428e-05	STRN4 | HGF | CASP2 | SNAI1 | RB1 | PIN1
6 genes	5.69255e-05	STRN4 | HGF | CASP2 | SNAI1 | RB1 | AKT2
6 genes	0.00783215	STRN4 | HGF | CASP2 | SNAI1 | PIN1 | AKT2
6 genes	0.000104036	STRN4 | HGF | CASP2 | SFRP1 | RB1 | PIN1
6 genes	8.68884e-06	STRN4 | HGF | CASP2 | SFRP1 | RB1 | AKT2
6 genes	0.0019228	STRN4 | HGF | CASP2 | SFRP1 | PIN1 | AKT2
6 genes	0.000252743	STRN4 | HGF | CASP2 | RB1 | PIN1 | AKT2
6 genes	3.31698e-06	STRN4 | HGF | STAT1 | SNAI1 | SFRP1 | RB1
6 genes	4.36932e-05	STRN4 | HGF | STAT1 | SNAI1 | SFRP1 | PIN1
6 genes	0.000225274	STRN4 | HGF | STAT1 | SNAI1 | SFRP1 | AKT2
6 genes	1.24344e-06	STRN4 | HGF | STAT1 | SNAI1 | RB1 | PIN1
6 genes	2.60998e-06	STRN4 | HGF | STAT1 | SNAI1 | RB1 | AKT2
6 genes	7.33524e-06	STRN4 | HGF | STAT1 | SNAI1 | PIN1 | AKT2
6 genes	6.25144e-07	STRN4 | HGF | STAT1 | SFRP1 | RB1 | PIN1
6 genes	5.56135e-06	STRN4 | HGF | STAT1 | SFRP1 | RB1 | AKT2
6 genes	6.43991e-05	STRN4 | HGF | STAT1 | SFRP1 | PIN1 | AKT2
6 genes	2.64618e-05	STRN4 | HGF | STAT1 | RB1 | PIN1 | AKT2
6 genes	0.0322959	STRN4 | HGF | SNAI1 | SFRP1 | RB1 | PIN1
6 genes	0.00189437	STRN4 | HGF | SNAI1 | SFRP1 | RB1 | AKT2
6 genes	0.0248405	STRN4 | HGF | SNAI1 | SFRP1 | PIN1 | AKT2
6 genes	0.00832468	STRN4 | HGF | SNAI1 | RB1 | PIN1 | AKT2
6 genes	0.0374119	STRN4 | HGF | SFRP1 | RB1 | PIN1 | AKT2
6 genes	5.79204e-06	STRN4 | WWP1 | CASP2 | STAT1 | SNAI1 | SFRP1
6 genes	4.12781e-09	STRN4 | WWP1 | CASP2 | STAT1 | SNAI1 | RB1
6 genes	4.398e-07	STRN4 | WWP1 | CASP2 | STAT1 | SNAI1 | PIN1
6 genes	5.66334e-06	STRN4 | WWP1 | CASP2 | STAT1 | SNAI1 | AKT2
6 genes	3.16227e-09	STRN4 | WWP1 | CASP2 | STAT1 | SFRP1 | RB1
6 genes	1.78837e-06	STRN4 | WWP1 | CASP2 | STAT1 | SFRP1 | PIN1
6 genes	1.45873e-06	STRN4 | WWP1 | CASP2 | STAT1 | SFRP1 | AKT2
6 genes	4.52277e-10	STRN4 | WWP1 | CASP2 | STAT1 | RB1 | PIN1
6 genes	1.02729e-08	STRN4 | WWP1 | CASP2 | STAT1 | RB1 | AKT2
6 genes	1.37564e-05	STRN4 | WWP1 | CASP2 | STAT1 | PIN1 | AKT2
6 genes	1.81261e-05	STRN4 | WWP1 | CASP2 | SNAI1 | SFRP1 | RB1
6 genes	2.09185e-05	STRN4 | WWP1 | CASP2 | SNAI1 | SFRP1 | PIN1
6 genes	1.76582e-05	STRN4 | WWP1 | CASP2 | SNAI1 | SFRP1 | AKT2
6 genes	1.84373e-05	STRN4 | WWP1 | CASP2 | SNAI1 | RB1 | PIN1
6 genes	9.63308e-05	STRN4 | WWP1 | CASP2 | SNAI1 | RB1 | AKT2
6 genes	0.000584538	STRN4 | WWP1 | CASP2 | SNAI1 | PIN1 | AKT2
6 genes	2.03824e-06	STRN4 | WWP1 | CASP2 | SFRP1 | RB1 | PIN1
6 genes	1.22629e-06	STRN4 | WWP1 | CASP2 | SFRP1 | RB1 | AKT2
6 genes	0.000124086	STRN4 | WWP1 | CASP2 | SFRP1 | PIN1 | AKT2
6 genes	2.13797e-06	STRN4 | WWP1 | CASP2 | RB1 | PIN1 | AKT2
6 genes	5.25513e-08	STRN4 | WWP1 | STAT1 | SNAI1 | SFRP1 | RB1
6 genes	0.00015427	STRN4 | WWP1 | STAT1 | SNAI1 | SFRP1 | PIN1
6 genes	9.92537e-06	STRN4 | WWP1 | STAT1 | SNAI1 | SFRP1 | AKT2
6 genes	5.12499e-08	STRN4 | WWP1 | STAT1 | SNAI1 | RB1 | PIN1
6 genes	5.1625e-07	STRN4 | WWP1 | STAT1 | SNAI1 | RB1 | AKT2
6 genes	2.89342e-05	STRN4 | WWP1 | STAT1 | SNAI1 | PIN1 | AKT2
6 genes	1.71512e-07	STRN4 | WWP1 | STAT1 | SFRP1 | RB1 | PIN1
6 genes	1.87816e-06	STRN4 | WWP1 | STAT1 | SFRP1 | RB1 | AKT2
6 genes	1.62339e-07	STRN4 | WWP1 | STAT1 | SFRP1 | PIN1 | AKT2
6 genes	9.1747e-08	STRN4 | WWP1 | STAT1 | RB1 | PIN1 | AKT2
6 genes	0.00523159	STRN4 | WWP1 | SNAI1 | SFRP1 | RB1 | PIN1
6 genes	0.00103416	STRN4 | WWP1 | SNAI1 | SFRP1 | RB1 | AKT2
6 genes	0.00509473	STRN4 | WWP1 | SNAI1 | SFRP1 | PIN1 | AKT2
6 genes	0.00613932	STRN4 | WWP1 | SNAI1 | RB1 | PIN1 | AKT2
6 genes	0.032662	STRN4 | WWP1 | SFRP1 | RB1 | PIN1 | AKT2
6 genes	1.61883e-07	STRN4 | CASP2 | STAT1 | SNAI1 | SFRP1 | RB1
6 genes	4.39585e-05	STRN4 | CASP2 | STAT1 | SNAI1 | SFRP1 | PIN1
6 genes	4.63391e-05	STRN4 | CASP2 | STAT1 | SNAI1 | SFRP1 | AKT2
6 genes	1.33753e-07	STRN4 | CASP2 | STAT1 | SNAI1 | RB1 | PIN1
6 genes	5.72463e-09	STRN4 | CASP2 | STAT1 | SNAI1 | RB1 | AKT2
6 genes	1.52917e-06	STRN4 | CASP2 | STAT1 | SNAI1 | PIN1 | AKT2
6 genes	4.96686e-06	STRN4 | CASP2 | STAT1 | SFRP1 | RB1 | PIN1
6 genes	3.13902e-08	STRN4 | CASP2 | STAT1 | SFRP1 | RB1 | AKT2
6 genes	3.35047e-05	STRN4 | CASP2 | STAT1 | SFRP1 | PIN1 | AKT2
6 genes	3.54311e-08	STRN4 | CASP2 | STAT1 | RB1 | PIN1 | AKT2
6 genes	0.000244815	STRN4 | CASP2 | SNAI1 | SFRP1 | RB1 | PIN1
6 genes	0.000702874	STRN4 | CASP2 | SNAI1 | SFRP1 | RB1 | AKT2
6 genes	0.0124541	STRN4 | CASP2 | SNAI1 | SFRP1 | PIN1 | AKT2
6 genes	4.64646e-05	STRN4 | CASP2 | SNAI1 | RB1 | PIN1 | AKT2
6 genes	6.37091e-05	STRN4 | CASP2 | SFRP1 | RB1 | PIN1 | AKT2
6 genes	2.2299e-06	STRN4 | STAT1 | SNAI1 | SFRP1 | RB1 | PIN1
6 genes	7.83876e-08	STRN4 | STAT1 | SNAI1 | SFRP1 | RB1 | AKT2
6 genes	6.61551e-05	STRN4 | STAT1 | SNAI1 | SFRP1 | PIN1 | AKT2
6 genes	1.35671e-08	STRN4 | STAT1 | SNAI1 | RB1 | PIN1 | AKT2
6 genes	6.01965e-07	STRN4 | STAT1 | SFRP1 | RB1 | PIN1 | AKT2
6 genes	0.00711961	STRN4 | SNAI1 | SFRP1 | RB1 | PIN1 | AKT2
6 genes	1.97917e-05	HGF | WWP1 | CASP2 | STAT1 | SNAI1 | SFRP1
6 genes	1.4494e-07	HGF | WWP1 | CASP2 | STAT1 | SNAI1 | RB1
6 genes	5.7467e-05	HGF | WWP1 | CASP2 | STAT1 | SNAI1 | PIN1
6 genes	2.28671e-06	HGF | WWP1 | CASP2 | STAT1 | SNAI1 | AKT2
6 genes	7.51892e-08	HGF | WWP1 | CASP2 | STAT1 | SFRP1 | RB1
6 genes	1.98317e-06	HGF | WWP1 | CASP2 | STAT1 | SFRP1 | PIN1
6 genes	6.28813e-07	HGF | WWP1 | CASP2 | STAT1 | SFRP1 | AKT2
6 genes	1.17589e-09	HGF | WWP1 | CASP2 | STAT1 | RB1 | PIN1
6 genes	9.99152e-09	HGF | WWP1 | CASP2 | STAT1 | RB1 | AKT2
6 genes	4.5864e-07	HGF | WWP1 | CASP2 | STAT1 | PIN1 | AKT2
6 genes	7.23242e-06	HGF | WWP1 | CASP2 | SNAI1 | SFRP1 | RB1
6 genes	0.000330571	HGF | WWP1 | CASP2 | SNAI1 | SFRP1 | PIN1
6 genes	0.000147281	HGF | WWP1 | CASP2 | SNAI1 | SFRP1 | AKT2
6 genes	6.34855e-05	HGF | WWP1 | CASP2 | SNAI1 | RB1 | PIN1
6 genes	6.90917e-05	HGF | WWP1 | CASP2 | SNAI1 | RB1 | AKT2
6 genes	0.00199012	HGF | WWP1 | CASP2 | SNAI1 | PIN1 | AKT2
6 genes	4.82453e-05	HGF | WWP1 | CASP2 | SFRP1 | RB1 | PIN1
6 genes	1.76177e-05	HGF | WWP1 | CASP2 | SFRP1 | RB1 | AKT2
6 genes	0.00179912	HGF | WWP1 | CASP2 | SFRP1 | PIN1 | AKT2
6 genes	0.000304461	HGF | WWP1 | CASP2 | RB1 | PIN1 | AKT2
6 genes	2.61096e-07	HGF | WWP1 | STAT1 | SNAI1 | SFRP1 | RB1
6 genes	9.8895e-06	HGF | WWP1 | STAT1 | SNAI1 | SFRP1 | PIN1
6 genes	5.52624e-07	HGF | WWP1 | STAT1 | SNAI1 | SFRP1 | AKT2
6 genes	5.23938e-08	HGF | WWP1 | STAT1 | SNAI1 | RB1 | PIN1
6 genes	3.79606e-08	HGF | WWP1 | STAT1 | SNAI1 | RB1 | AKT2
6 genes	1.6628e-07	HGF | WWP1 | STAT1 | SNAI1 | PIN1 | AKT2
6 genes	3.63177e-06	HGF | WWP1 | STAT1 | SFRP1 | RB1 | PIN1
6 genes	1.5714e-07	HGF | WWP1 | STAT1 | SFRP1 | RB1 | AKT2
6 genes	3.4826e-07	HGF | WWP1 | STAT1 | SFRP1 | PIN1 | AKT2
6 genes	1.49554e-08	HGF | WWP1 | STAT1 | RB1 | PIN1 | AKT2
6 genes	0.0148951	HGF | WWP1 | SNAI1 | SFRP1 | RB1 | PIN1
6 genes	0.000351653	HGF | WWP1 | SNAI1 | SFRP1 | RB1 | AKT2
6 genes	0.00761387	HGF | WWP1 | SNAI1 | SFRP1 | PIN1 | AKT2
6 genes	0.0041306	HGF | WWP1 | SNAI1 | RB1 | PIN1 | AKT2
6 genes	0.00578061	HGF | WWP1 | SFRP1 | RB1 | PIN1 | AKT2
6 genes	1.31023e-05	HGF | CASP2 | STAT1 | SNAI1 | SFRP1 | RB1
6 genes	0.0163362	HGF | CASP2 | STAT1 | SNAI1 | SFRP1 | PIN1
6 genes	5.12769e-05	HGF | CASP2 | STAT1 | SNAI1 | SFRP1 | AKT2
6 genes	9.23368e-06	HGF | CASP2 | STAT1 | SNAI1 | RB1 | PIN1
6 genes	2.97293e-06	HGF | CASP2 | STAT1 | SNAI1 | RB1 | AKT2
6 genes	1.92445e-05	HGF | CASP2 | STAT1 | SNAI1 | PIN1 | AKT2
6 genes	8.63236e-05	HGF | CASP2 | STAT1 | SFRP1 | RB1 | PIN1
6 genes	5.47143e-06	HGF | CASP2 | STAT1 | SFRP1 | RB1 | AKT2
6 genes	6.22179e-06	HGF | CASP2 | STAT1 | SFRP1 | PIN1 | AKT2
6 genes	3.2818e-07	HGF | CASP2 | STAT1 | RB1 | PIN1 | AKT2
6 genes	0.00068504	HGF | CASP2 | SNAI1 | SFRP1 | RB1 | PIN1
6 genes	5.59241e-05	HGF | CASP2 | SNAI1 | SFRP1 | RB1 | AKT2
6 genes	0.0541527	HGF | CASP2 | SNAI1 | SFRP1 | PIN1 | AKT2
6 genes	2.40668e-05	HGF | CASP2 | SNAI1 | RB1 | PIN1 | AKT2
6 genes	0.000277733	HGF | CASP2 | SFRP1 | RB1 | PIN1 | AKT2
6 genes	1.03791e-06	HGF | STAT1 | SNAI1 | SFRP1 | RB1 | PIN1
6 genes	1.24884e-07	HGF | STAT1 | SNAI1 | SFRP1 | RB1 | AKT2
6 genes	5.07785e-05	HGF | STAT1 | SNAI1 | SFRP1 | PIN1 | AKT2
6 genes	2.18382e-06	HGF | STAT1 | SNAI1 | RB1 | PIN1 | AKT2
6 genes	8.06379e-06	HGF | STAT1 | SFRP1 | RB1 | PIN1 | AKT2
6 genes	0.00283997	HGF | SNAI1 | SFRP1 | RB1 | PIN1 | AKT2
6 genes	2.44519e-09	WWP1 | CASP2 | STAT1 | SNAI1 | SFRP1 | RB1
6 genes	4.68389e-06	WWP1 | CASP2 | STAT1 | SNAI1 | SFRP1 | PIN1
6 genes	1.34621e-06	WWP1 | CASP2 | STAT1 | SNAI1 | SFRP1 | AKT2
6 genes	2.35684e-07	WWP1 | CASP2 | STAT1 | SNAI1 | RB1 | PIN1
6 genes	1.85246e-07	WWP1 | CASP2 | STAT1 | SNAI1 | RB1 | AKT2
6 genes	1.84012e-06	WWP1 | CASP2 | STAT1 | SNAI1 | PIN1 | AKT2
6 genes	1.08653e-07	WWP1 | CASP2 | STAT1 | SFRP1 | RB1 | PIN1
6 genes	2.35583e-08	WWP1 | CASP2 | STAT1 | SFRP1 | RB1 | AKT2
6 genes	1.1216e-06	WWP1 | CASP2 | STAT1 | SFRP1 | PIN1 | AKT2
6 genes	5.58362e-08	WWP1 | CASP2 | STAT1 | RB1 | PIN1 | AKT2
6 genes	0.000114941	WWP1 | CASP2 | SNAI1 | SFRP1 | RB1 | PIN1
6 genes	7.66888e-05	WWP1 | CASP2 | SNAI1 | SFRP1 | RB1 | AKT2
6 genes	0.00169173	WWP1 | CASP2 | SNAI1 | SFRP1 | PIN1 | AKT2
6 genes	4.42187e-05	WWP1 | CASP2 | SNAI1 | RB1 | PIN1 | AKT2
6 genes	0.000520237	WWP1 | CASP2 | SFRP1 | RB1 | PIN1 | AKT2
6 genes	3.58164e-07	WWP1 | STAT1 | SNAI1 | SFRP1 | RB1 | PIN1
6 genes	3.11035e-08	WWP1 | STAT1 | SNAI1 | SFRP1 | RB1 | AKT2
6 genes	9.58585e-06	WWP1 | STAT1 | SNAI1 | SFRP1 | PIN1 | AKT2
6 genes	5.94198e-07	WWP1 | STAT1 | SNAI1 | RB1 | PIN1 | AKT2
6 genes	2.50643e-07	WWP1 | STAT1 | SFRP1 | RB1 | PIN1 | AKT2
6 genes	0.00097066	WWP1 | SNAI1 | SFRP1 | RB1 | PIN1 | AKT2
6 genes	9.69745e-06	CASP2 | STAT1 | SNAI1 | SFRP1 | RB1 | PIN1
6 genes	1.45237e-07	CASP2 | STAT1 | SNAI1 | SFRP1 | RB1 | AKT2
6 genes	0.000154387	CASP2 | STAT1 | SNAI1 | SFRP1 | PIN1 | AKT2
6 genes	4.70262e-06	CASP2 | STAT1 | SNAI1 | RB1 | PIN1 | AKT2
6 genes	4.51085e-06	CASP2 | STAT1 | SFRP1 | RB1 | PIN1 | AKT2
6 genes	4.1935e-05	CASP2 | SNAI1 | SFRP1 | RB1 | PIN1 | AKT2
6 genes	9.15182e-08	STAT1 | SNAI1 | SFRP1 | RB1 | PIN1 | AKT2
7 genes	1.50661e-05	STRN4 | HGF | WWP1 | CASP2 | STAT1 | SNAI1 | SFRP1
7 genes	6.19493e-08	STRN4 | HGF | WWP1 | CASP2 | STAT1 | SNAI1 | RB1
7 genes	1.1848e-06	STRN4 | HGF | WWP1 | CASP2 | STAT1 | SNAI1 | PIN1
7 genes	1.6144e-06	STRN4 | HGF | WWP1 | CASP2 | STAT1 | SNAI1 | AKT2
7 genes	5.60142e-09	STRN4 | HGF | WWP1 | CASP2 | STAT1 | SFRP1 | RB1
7 genes	8.04862e-07	STRN4 | HGF | WWP1 | CASP2 | STAT1 | SFRP1 | PIN1
7 genes	3.68488e-07	STRN4 | HGF | WWP1 | CASP2 | STAT1 | SFRP1 | AKT2
7 genes	1.20256e-09	STRN4 | HGF | WWP1 | CASP2 | STAT1 | RB1 | PIN1
7 genes	8.8943e-09	STRN4 | HGF | WWP1 | CASP2 | STAT1 | RB1 | AKT2
7 genes	6.66157e-08	STRN4 | HGF | WWP1 | CASP2 | STAT1 | PIN1 | AKT2
7 genes	1.8158e-05	STRN4 | HGF | WWP1 | CASP2 | SNAI1 | SFRP1 | RB1
7 genes	2.80317e-05	STRN4 | HGF | WWP1 | CASP2 | SNAI1 | SFRP1 | PIN1
7 genes	8.92559e-06	STRN4 | HGF | WWP1 | CASP2 | SNAI1 | SFRP1 | AKT2
7 genes	1.43745e-05	STRN4 | HGF | WWP1 | CASP2 | SNAI1 | RB1 | PIN1
7 genes	0.000101997	STRN4 | HGF | WWP1 | CASP2 | SNAI1 | RB1 | AKT2
7 genes	0.00072381	STRN4 | HGF | WWP1 | CASP2 | SNAI1 | PIN1 | AKT2
7 genes	1.96869e-06	STRN4 | HGF | WWP1 | CASP2 | SFRP1 | RB1 | PIN1
7 genes	2.15586e-06	STRN4 | HGF | WWP1 | CASP2 | SFRP1 | RB1 | AKT2
7 genes	0.000253665	STRN4 | HGF | WWP1 | CASP2 | SFRP1 | PIN1 | AKT2
7 genes	1.66234e-05	STRN4 | HGF | WWP1 | CASP2 | RB1 | PIN1 | AKT2
7 genes	9.19613e-07	STRN4 | HGF | WWP1 | STAT1 | SNAI1 | SFRP1 | RB1
7 genes	4.57321e-05	STRN4 | HGF | WWP1 | STAT1 | SNAI1 | SFRP1 | PIN1
7 genes	1.6584e-05	STRN4 | HGF | WWP1 | STAT1 | SNAI1 | SFRP1 | AKT2
7 genes	8.47141e-08	STRN4 | HGF | WWP1 | STAT1 | SNAI1 | RB1 | PIN1
7 genes	1.01732e-07	STRN4 | HGF | WWP1 | STAT1 | SNAI1 | RB1 | AKT2
7 genes	1.82323e-06	STRN4 | HGF | WWP1 | STAT1 | SNAI1 | PIN1 | AKT2
7 genes	3.38744e-07	STRN4 | HGF | WWP1 | STAT1 | SFRP1 | RB1 | PIN1
7 genes	8.38062e-08	STRN4 | HGF | WWP1 | STAT1 | SFRP1 | RB1 | AKT2
7 genes	6.62869e-06	STRN4 | HGF | WWP1 | STAT1 | SFRP1 | PIN1 | AKT2
7 genes	2.93582e-08	STRN4 | HGF | WWP1 | STAT1 | RB1 | PIN1 | AKT2
7 genes	0.0235006	STRN4 | HGF | WWP1 | SNAI1 | SFRP1 | RB1 | PIN1
7 genes	0.00314587	STRN4 | HGF | WWP1 | SNAI1 | SFRP1 | RB1 | AKT2
7 genes	0.00673654	STRN4 | HGF | WWP1 | SNAI1 | SFRP1 | PIN1 | AKT2
7 genes	0.00918123	STRN4 | HGF | WWP1 | SNAI1 | RB1 | PIN1 | AKT2
7 genes	0.00851947	STRN4 | HGF | WWP1 | SFRP1 | RB1 | PIN1 | AKT2
7 genes	1.8922e-07	STRN4 | HGF | CASP2 | STAT1 | SNAI1 | SFRP1 | RB1
7 genes	9.73116e-05	STRN4 | HGF | CASP2 | STAT1 | SNAI1 | SFRP1 | PIN1
7 genes	0.000417652	STRN4 | HGF | CASP2 | STAT1 | SNAI1 | SFRP1 | AKT2
7 genes	4.03253e-08	STRN4 | HGF | CASP2 | STAT1 | SNAI1 | RB1 | PIN1
7 genes	1.12457e-09	STRN4 | HGF | CASP2 | STAT1 | SNAI1 | RB1 | AKT2
7 genes	1.04934e-05	STRN4 | HGF | CASP2 | STAT1 | SNAI1 | PIN1 | AKT2
7 genes	8.48805e-06	STRN4 | HGF | CASP2 | STAT1 | SFRP1 | RB1 | PIN1
7 genes	1.19603e-07	STRN4 | HGF | CASP2 | STAT1 | SFRP1 | RB1 | AKT2
7 genes	4.29136e-05	STRN4 | HGF | CASP2 | STAT1 | SFRP1 | PIN1 | AKT2
7 genes	2.63543e-07	STRN4 | HGF | CASP2 | STAT1 | RB1 | PIN1 | AKT2
7 genes	0.000132668	STRN4 | HGF | CASP2 | SNAI1 | SFRP1 | RB1 | PIN1
7 genes	0.000101247	STRN4 | HGF | CASP2 | SNAI1 | SFRP1 | RB1 | AKT2
7 genes	0.0175076	STRN4 | HGF | CASP2 | SNAI1 | SFRP1 | PIN1 | AKT2
7 genes	0.000281427	STRN4 | HGF | CASP2 | SNAI1 | RB1 | PIN1 | AKT2
7 genes	0.000323496	STRN4 | HGF | CASP2 | SFRP1 | RB1 | PIN1 | AKT2
7 genes	3.83448e-07	STRN4 | HGF | STAT1 | SNAI1 | SFRP1 | RB1 | PIN1
7 genes	7.13294e-08	STRN4 | HGF | STAT1 | SNAI1 | SFRP1 | RB1 | AKT2
7 genes	5.26358e-05	STRN4 | HGF | STAT1 | SNAI1 | SFRP1 | PIN1 | AKT2
7 genes	1.68936e-06	STRN4 | HGF | STAT1 | SNAI1 | RB1 | PIN1 | AKT2
7 genes	1.27901e-06	STRN4 | HGF | STAT1 | SFRP1 | RB1 | PIN1 | AKT2
7 genes	0.019086	STRN4 | HGF | SNAI1 | SFRP1 | RB1 | PIN1 | AKT2
7 genes	3.44579e-08	STRN4 | WWP1 | CASP2 | STAT1 | SNAI1 | SFRP1 | RB1
7 genes	6.42545e-07	STRN4 | WWP1 | CASP2 | STAT1 | SNAI1 | SFRP1 | PIN1
7 genes	2.53832e-05	STRN4 | WWP1 | CASP2 | STAT1 | SNAI1 | SFRP1 | AKT2
7 genes	4.43911e-09	STRN4 | WWP1 | CASP2 | STAT1 | SNAI1 | RB1 | PIN1
7 genes	3.0678e-08	STRN4 | WWP1 | CASP2 | STAT1 | SNAI1 | RB1 | AKT2
7 genes	9.22054e-06	STRN4 | WWP1 | CASP2 | STAT1 | SNAI1 | PIN1 | AKT2
7 genes	2.31947e-09	STRN4 | WWP1 | CASP2 | STAT1 | SFRP1 | RB1 | PIN1
7 genes	3.89958e-08	STRN4 | WWP1 | CASP2 | STAT1 | SFRP1 | RB1 | AKT2
7 genes	1.55568e-06	STRN4 | WWP1 | CASP2 | STAT1 | SFRP1 | PIN1 | AKT2
7 genes	6.76185e-08	STRN4 | WWP1 | CASP2 | STAT1 | RB1 | PIN1 | AKT2
7 genes	1.05808e-05	STRN4 | WWP1 | CASP2 | SNAI1 | SFRP1 | RB1 | PIN1
7 genes	3.91114e-05	STRN4 | WWP1 | CASP2 | SNAI1 | SFRP1 | RB1 | AKT2
7 genes	0.00117797	STRN4 | WWP1 | CASP2 | SNAI1 | SFRP1 | PIN1 | AKT2
7 genes	9.81223e-05	STRN4 | WWP1 | CASP2 | SNAI1 | RB1 | PIN1 | AKT2
7 genes	1.27552e-05	STRN4 | WWP1 | CASP2 | SFRP1 | RB1 | PIN1 | AKT2
7 genes	3.58142e-08	STRN4 | WWP1 | STAT1 | SNAI1 | SFRP1 | RB1 | PIN1
7 genes	2.78832e-09	STRN4 | WWP1 | STAT1 | SNAI1 | SFRP1 | RB1 | AKT2
7 genes	1.06293e-05	STRN4 | WWP1 | STAT1 | SNAI1 | SFRP1 | PIN1 | AKT2
7 genes	2.02464e-07	STRN4 | WWP1 | STAT1 | SNAI1 | RB1 | PIN1 | AKT2
7 genes	1.80497e-07	STRN4 | WWP1 | STAT1 | SFRP1 | RB1 | PIN1 | AKT2
7 genes	0.00148997	STRN4 | WWP1 | SNAI1 | SFRP1 | RB1 | PIN1 | AKT2
7 genes	9.94585e-07	STRN4 | CASP2 | STAT1 | SNAI1 | SFRP1 | RB1 | PIN1
7 genes	1.07397e-07	STRN4 | CASP2 | STAT1 | SNAI1 | SFRP1 | RB1 | AKT2
7 genes	8.99001e-07	STRN4 | CASP2 | STAT1 | SNAI1 | SFRP1 | PIN1 | AKT2
7 genes	9.36233e-08	STRN4 | CASP2 | STAT1 | SNAI1 | RB1 | PIN1 | AKT2
7 genes	1.44324e-07	STRN4 | CASP2 | STAT1 | SFRP1 | RB1 | PIN1 | AKT2
7 genes	0.000258155	STRN4 | CASP2 | SNAI1 | SFRP1 | RB1 | PIN1 | AKT2
7 genes	3.48246e-08	STRN4 | STAT1 | SNAI1 | SFRP1 | RB1 | PIN1 | AKT2
7 genes	4.60053e-08	HGF | WWP1 | CASP2 | STAT1 | SNAI1 | SFRP1 | RB1
7 genes	6.58386e-06	HGF | WWP1 | CASP2 | STAT1 | SNAI1 | SFRP1 | PIN1
7 genes	1.39792e-06	HGF | WWP1 | CASP2 | STAT1 | SNAI1 | SFRP1 | AKT2
7 genes	5.36028e-08	HGF | WWP1 | CASP2 | STAT1 | SNAI1 | RB1 | PIN1
7 genes	2.34949e-07	HGF | WWP1 | CASP2 | STAT1 | SNAI1 | RB1 | AKT2
7 genes	2.30715e-06	HGF | WWP1 | CASP2 | STAT1 | SNAI1 | PIN1 | AKT2
7 genes	3.00067e-08	HGF | WWP1 | CASP2 | STAT1 | SFRP1 | RB1 | PIN1
7 genes	1.96216e-08	HGF | WWP1 | CASP2 | STAT1 | SFRP1 | RB1 | AKT2
7 genes	2.62913e-07	HGF | WWP1 | CASP2 | STAT1 | SFRP1 | PIN1 | AKT2
7 genes	1.45864e-08	HGF | WWP1 | CASP2 | STAT1 | RB1 | PIN1 | AKT2
7 genes	0.000102687	HGF | WWP1 | CASP2 | SNAI1 | SFRP1 | RB1 | PIN1
7 genes	8.35469e-05	HGF | WWP1 | CASP2 | SNAI1 | SFRP1 | RB1 | AKT2
7 genes	0.000383656	HGF | WWP1 | CASP2 | SNAI1 | SFRP1 | PIN1 | AKT2
7 genes	4.42187e-05	HGF | WWP1 | CASP2 | SNAI1 | RB1 | PIN1 | AKT2
7 genes	0.00028467	HGF | WWP1 | CASP2 | SFRP1 | RB1 | PIN1 | AKT2
7 genes	1.02359e-07	HGF | WWP1 | STAT1 | SNAI1 | SFRP1 | RB1 | PIN1
7 genes	5.07919e-09	HGF | WWP1 | STAT1 | SNAI1 | SFRP1 | RB1 | AKT2
7 genes	4.82585e-06	HGF | WWP1 | STAT1 | SNAI1 | SFRP1 | PIN1 | AKT2
7 genes	2.06432e-07	HGF | WWP1 | STAT1 | SNAI1 | RB1 | PIN1 | AKT2
7 genes	2.85735e-08	HGF | WWP1 | STAT1 | SFRP1 | RB1 | PIN1 | AKT2
7 genes	0.00148824	HGF | WWP1 | SNAI1 | SFRP1 | RB1 | PIN1 | AKT2
7 genes	5.24986e-06	HGF | CASP2 | STAT1 | SNAI1 | SFRP1 | RB1 | PIN1
7 genes	7.79477e-07	HGF | CASP2 | STAT1 | SNAI1 | SFRP1 | RB1 | AKT2
7 genes	3.88994e-05	HGF | CASP2 | STAT1 | SNAI1 | SFRP1 | PIN1 | AKT2
7 genes	1.17123e-06	HGF | CASP2 | STAT1 | SNAI1 | RB1 | PIN1 | AKT2
7 genes	4.1179e-07	HGF | CASP2 | STAT1 | SFRP1 | RB1 | PIN1 | AKT2
7 genes	3.40572e-05	HGF | CASP2 | SNAI1 | SFRP1 | RB1 | PIN1 | AKT2
7 genes	6.04132e-07	HGF | STAT1 | SNAI1 | SFRP1 | RB1 | PIN1 | AKT2
7 genes	3.52664e-08	WWP1 | CASP2 | STAT1 | SNAI1 | SFRP1 | RB1 | PIN1
7 genes	5.28011e-08	WWP1 | CASP2 | STAT1 | SNAI1 | SFRP1 | RB1 | AKT2
7 genes	7.11515e-06	WWP1 | CASP2 | STAT1 | SNAI1 | SFRP1 | PIN1 | AKT2
7 genes	6.12811e-07	WWP1 | CASP2 | STAT1 | SNAI1 | RB1 | PIN1 | AKT2
7 genes	3.84672e-07	WWP1 | CASP2 | STAT1 | SFRP1 | RB1 | PIN1 | AKT2
7 genes	3.98197e-05	WWP1 | CASP2 | SNAI1 | SFRP1 | RB1 | PIN1 | AKT2
7 genes	4.30418e-10	WWP1 | STAT1 | SNAI1 | SFRP1 | RB1 | PIN1 | AKT2
7 genes	2.78737e-07	CASP2 | STAT1 | SNAI1 | SFRP1 | RB1 | PIN1 | AKT2
8 genes	8.55271e-08	STRN4 | HGF | WWP1 | CASP2 | STAT1 | SNAI1 | SFRP1 | RB1
8 genes	6.25002e-07	STRN4 | HGF | WWP1 | CASP2 | STAT1 | SNAI1 | SFRP1 | PIN1
8 genes	4.70606e-06	STRN4 | HGF | WWP1 | CASP2 | STAT1 | SNAI1 | SFRP1 | AKT2
8 genes	1.52051e-08	STRN4 | HGF | WWP1 | CASP2 | STAT1 | SNAI1 | RB1 | PIN1
8 genes	5.17941e-08	STRN4 | HGF | WWP1 | CASP2 | STAT1 | SNAI1 | RB1 | AKT2
8 genes	4.55341e-06	STRN4 | HGF | WWP1 | CASP2 | STAT1 | SNAI1 | PIN1 | AKT2
8 genes	2.11158e-09	STRN4 | HGF | WWP1 | CASP2 | STAT1 | SFRP1 | RB1 | PIN1
8 genes	1.15926e-08	STRN4 | HGF | WWP1 | CASP2 | STAT1 | SFRP1 | RB1 | AKT2
8 genes	3.78372e-08	STRN4 | HGF | WWP1 | CASP2 | STAT1 | SFRP1 | PIN1 | AKT2
8 genes	1.77989e-07	STRN4 | HGF | WWP1 | CASP2 | STAT1 | RB1 | PIN1 | AKT2
8 genes	6.43723e-06	STRN4 | HGF | WWP1 | CASP2 | SNAI1 | SFRP1 | RB1 | PIN1
8 genes	0.000130991	STRN4 | HGF | WWP1 | CASP2 | SNAI1 | SFRP1 | RB1 | AKT2
8 genes	0.00106008	STRN4 | HGF | WWP1 | CASP2 | SNAI1 | SFRP1 | PIN1 | AKT2
8 genes	3.99273e-05	STRN4 | HGF | WWP1 | CASP2 | SNAI1 | RB1 | PIN1 | AKT2
8 genes	1.12506e-05	STRN4 | HGF | WWP1 | CASP2 | SFRP1 | RB1 | PIN1 | AKT2
8 genes	4.81221e-09	STRN4 | HGF | WWP1 | STAT1 | SNAI1 | SFRP1 | RB1 | PIN1
8 genes	1.97666e-08	STRN4 | HGF | WWP1 | STAT1 | SNAI1 | SFRP1 | RB1 | AKT2
8 genes	1.78603e-05	STRN4 | HGF | WWP1 | STAT1 | SNAI1 | SFRP1 | PIN1 | AKT2
8 genes	4.81245e-08	STRN4 | HGF | WWP1 | STAT1 | SNAI1 | RB1 | PIN1 | AKT2
8 genes	4.59185e-08	STRN4 | HGF | WWP1 | STAT1 | SFRP1 | RB1 | PIN1 | AKT2
8 genes	0.0390485	STRN4 | HGF | WWP1 | SNAI1 | SFRP1 | RB1 | PIN1 | AKT2
8 genes	2.03787e-06	STRN4 | HGF | CASP2 | STAT1 | SNAI1 | SFRP1 | RB1 | PIN1
8 genes	1.15897e-06	STRN4 | HGF | CASP2 | STAT1 | SNAI1 | SFRP1 | RB1 | AKT2
8 genes	5.31544e-05	STRN4 | HGF | CASP2 | STAT1 | SNAI1 | SFRP1 | PIN1 | AKT2
8 genes	2.21422e-09	STRN4 | HGF | CASP2 | STAT1 | SNAI1 | RB1 | PIN1 | AKT2
8 genes	1.02249e-06	STRN4 | HGF | CASP2 | STAT1 | SFRP1 | RB1 | PIN1 | AKT2
8 genes	0.000233683	STRN4 | HGF | CASP2 | SNAI1 | SFRP1 | RB1 | PIN1 | AKT2
8 genes	1.21132e-07	STRN4 | HGF | STAT1 | SNAI1 | SFRP1 | RB1 | PIN1 | AKT2
8 genes	6.76224e-09	STRN4 | WWP1 | CASP2 | STAT1 | SNAI1 | SFRP1 | RB1 | PIN1
8 genes	5.17941e-08	STRN4 | WWP1 | CASP2 | STAT1 | SNAI1 | SFRP1 | RB1 | AKT2
8 genes	9.08127e-06	STRN4 | WWP1 | CASP2 | STAT1 | SNAI1 | SFRP1 | PIN1 | AKT2
8 genes	4.60816e-07	STRN4 | WWP1 | CASP2 | STAT1 | SNAI1 | RB1 | PIN1 | AKT2
8 genes	1.81106e-08	STRN4 | WWP1 | CASP2 | STAT1 | SFRP1 | RB1 | PIN1 | AKT2
8 genes	3.76778e-05	STRN4 | WWP1 | CASP2 | SNAI1 | SFRP1 | RB1 | PIN1 | AKT2
8 genes	3.44291e-08	STRN4 | WWP1 | STAT1 | SNAI1 | SFRP1 | RB1 | PIN1 | AKT2
8 genes	2.74936e-07	STRN4 | CASP2 | STAT1 | SNAI1 | SFRP1 | RB1 | PIN1 | AKT2
8 genes	8.3015e-09	HGF | WWP1 | CASP2 | STAT1 | SNAI1 | SFRP1 | RB1 | PIN1
8 genes	1.37525e-07	HGF | WWP1 | CASP2 | STAT1 | SNAI1 | SFRP1 | RB1 | AKT2
8 genes	3.25316e-06	HGF | WWP1 | CASP2 | STAT1 | SNAI1 | SFRP1 | PIN1 | AKT2
8 genes	2.10455e-06	HGF | WWP1 | CASP2 | STAT1 | SNAI1 | RB1 | PIN1 | AKT2
8 genes	9.48901e-08	HGF | WWP1 | CASP2 | STAT1 | SFRP1 | RB1 | PIN1 | AKT2
8 genes	3.98197e-05	HGF | WWP1 | CASP2 | SNAI1 | SFRP1 | RB1 | PIN1 | AKT2
8 genes	6.42805e-08	HGF | WWP1 | STAT1 | SNAI1 | SFRP1 | RB1 | PIN1 | AKT2
8 genes	2.25715e-06	HGF | CASP2 | STAT1 | SNAI1 | SFRP1 | RB1 | PIN1 | AKT2
8 genes	2.70266e-07	WWP1 | CASP2 | STAT1 | SNAI1 | SFRP1 | RB1 | PIN1 | AKT2
9 genes	8.05716e-09	STRN4 | HGF | WWP1 | CASP2 | STAT1 | SNAI1 | SFRP1 | RB1 | PIN1
9 genes	5.17941e-08	STRN4 | HGF | WWP1 | CASP2 | STAT1 | SNAI1 | SFRP1 | RB1 | AKT2
9 genes	4.39562e-08	STRN4 | HGF | WWP1 | CASP2 | STAT1 | SNAI1 | SFRP1 | PIN1 | AKT2
9 genes	3.94299e-07	STRN4 | HGF | WWP1 | CASP2 | STAT1 | SNAI1 | RB1 | PIN1 | AKT2
9 genes	4.4675e-08	STRN4 | HGF | WWP1 | CASP2 | STAT1 | SFRP1 | RB1 | PIN1 | AKT2
9 genes	0.000212648	STRN4 | HGF | WWP1 | CASP2 | SNAI1 | SFRP1 | RB1 | PIN1 | AKT2
9 genes	7.32026e-09	STRN4 | HGF | WWP1 | STAT1 | SNAI1 | SFRP1 | RB1 | PIN1 | AKT2
9 genes	2.05703e-07	STRN4 | HGF | CASP2 | STAT1 | SNAI1 | SFRP1 | RB1 | PIN1 | AKT2
9 genes	5.94842e-07	STRN4 | WWP1 | CASP2 | STAT1 | SNAI1 | SFRP1 | RB1 | PIN1 | AKT2
9 genes	2.70266e-07	HGF | WWP1 | CASP2 | STAT1 | SNAI1 | SFRP1 | RB1 | PIN1 | AKT2
10 genes	5.47966e-07	STRN4 | HGF | WWP1 | CASP2 | STAT1 | SNAI1 | SFRP1 | RB1 | PIN1 | AKT2
